# Supplementary material for: Spatiotemporal dynamics of land use land cover change and its drivers in the western part of Lake Abaya, Ethiopia
Source: PeerJ. 2024 Sep 18;12:e17892. doi: 10.7717/peerj.17892 (PMC11416075; doi:10.7717/peerj.17892)
Supplement: Supplemental Information 3 [file peerj-12-17892-s003.xlsx]

## Sheet: Sheet1
Latitude	Longitude	utm_zone	Altitude (m)
6.4944	37.7983	37N	1176
6.4944	37.7924	37N	1176
6.48424	37.7837	37N	1176
6.46899	37.7837	37N	1176
6.4552	37.7837	37N	1176
6.44141	37.7771	37N	1176
6.42979	37.7771	37N	1176
6.41817	37.7764	37N	1176
6.40656	37.7786	37N	1176
6.40438	37.7859	37N	1176
6.39203	37.7946	37N	1176
6.38477	37.7939	37N	1176
6.37533	37.7961	37N	1176
6.35936	37.7924	37N	1176
6.35064	37.7946	37N	1176
6.34338	37.7961	37N	1176
6.36008	37.7976	37N	1176
6.39203	37.8034	37N	1176
6.42906	37.8085	37N	1176
6.41164	37.8041	37N	1176
6.44576	37.81	37N	1176
6.47117	37.8151	37N	1176
6.48134	37.8158	37N	1176
6.48424	37.8005	37N	1176
6.4719	37.8027	37N	1176
6.46754	37.7968	37N	1176
6.45738	37.8027	37N	1176
6.44721	37.791	37N	1176
6.43995	37.8005	37N	1176
6.43052	37.7873	37N	1176
6.41672	37.791	37N	1176
6.42471	37.7976	37N	1176
6.44743	37.7641	37N	1194
6.45008	37.7626	37N	1196.3
6.45158	37.761	37N	1200.2
6.45043	37.7595	37N	1204.1
6.45308	37.7587	37N	1203.9
6.45355	37.7568	37N	1206.8
6.45193	37.7567	37N	1207.9
6.4517	37.7558	37N	1208.1
6.45193	37.7546	37N	1211.2
6.45239	37.7498	37N	1217
6.4615	37.7726	37N	1184.9
6.46381	37.7726	37N	1183.5
6.46381	37.7715	37N	1184.5
6.46208	37.7705	37N	1188.2
6.44224	37.7686	37N	1189.4
6.44616	37.7686	37N	1186.3
6.45078	37.7729	37N	1181.6
6.4562	37.7641	37N	1194.6
6.45458	37.7628	37N	1196.5
6.46992	37.765	37N	1187.2
6.47396	37.7653	37N	1187.7
6.4607	37.7536	37N	1209.2
6.45389	37.7523	37N	1210.9
6.45124	37.7502	37N	1217.3
6.46173	37.7625	37N	1194
6.46646	37.7661	37N	1190.1
6.46704	37.7677	37N	1188.8
6.46335	37.7648	37N	1192.8
6.46393	37.7631	37N	1192.4
6.4607	37.7561	37N	1203
6.46254	37.7576	37N	1201.8
6.49223	37.8166	37N	1176
6.43647	37.7698	37N	1181
6.43324	37.7697	37N	1182.4
6.44386	37.7713	37N	1183.3
6.44605	37.7727	37N	1181.5
6.44812	37.7739	37N	1182.6
6.4502	37.7742	37N	1182.9
6.45101	37.7747	37N	1182.3
6.44997	37.7759	37N	1178.9
6.45274	37.777	37N	1180.8
6.45458	37.7775	37N	1179
6.45574	37.7768	37N	1180.6
6.45804	37.7768	37N	1181.7
6.45977	37.7776	37N	1179.5
6.46139	37.7767	37N	1182.3
6.46266	37.7767	37N	1180.8
6.46912	37.7767	37N	1179.2
6.47085	37.7739	37N	1180
6.47246	37.7725	37N	1179
6.47442	37.7724	37N	1178.7
6.47546	37.7712	37N	1179.5
6.47696	37.7718	37N	1180.5
6.47858	37.7717	37N	1180.7
6.48019	37.7704	37N	1179.1
6.48031	37.7691	37N	1179.8
6.48319	37.7701	37N	1179.8
6.48515	37.7716	37N	1181.9
6.48653	37.773	37N	1182.5
6.41744	37.7664	37N	1189
6.42194	37.7633	37N	1197
6.42378	37.7629	37N	1200.7
6.43394	37.7658	37N	1196.2
6.42563	37.7641	37N	1195.1
6.43497	37.76	37N	1208
6.43463	37.7629	37N	1204
6.43544	37.7674	37N	1193.3
6.43843	37.767	37N	1190.2
6.44155	37.7474	37N	1242.4
6.44882	37.7484	37N	1224
6.44282	37.7514	37N	1228.9
6.44363	37.7594	37N	1212.7
6.44293	37.7571	37N	1216.8
6.4359	37.7651	37N	1198.6
6.42655	37.7657	37N	1193.7
6.41709	37.7643	37N	1190.5
6.41582	37.7561	37N	1207.6
6.4051	37.7705	37N	1186.3
6.40798	37.7608	37N	1207.5
6.43693	37.7508	37N	1234.7
6.43901	37.7578	37N	1214.2
6.44063	37.7547	37N	1222.3
6.44328	37.7547	37N	1222.6
6.44224	37.7628	37N	1204.3
6.42482	37.7666	37N	1191.5
6.41502	37.7673	37N	1186.4
6.41352	37.7664	37N	1189
6.40556	37.7676	37N	1190.9
6.40556	37.7644	37N	1199.4
6.40429	37.7554	37N	1225
6.39956	37.7647	37N	1204.1
6.40637	37.769	37N	1187.3
6.41086	37.7632	37N	1196.4
6.40867	37.7661	37N	1191.4
6.43117	37.7634	37N	1200.4
6.43071	37.768	37N	1188.1
6.3916	37.7831	37N	1188.3
6.39033	37.7805	37N	1192.7
6.39252	37.7792	37N	1190.9
6.40002	37.761	37N	1213.9
6.43417	37.7561	37N	1218.9
6.43151	37.7554	37N	1222.5
6.42794	37.7582	37N	1212
6.41963	37.7511	37N	1221.7
6.47204	37.7553	37N	1204.3
6.47286	37.7583	37N	1193.8
6.47858	37.7591	37N	1195.4
6.48578	37.7633	37N	1190.9
6.48288	37.7675	37N	1183
6.46699	37.7548	37N	1204.4
6.47055	37.762	37N	1191.7
6.47262	37.7608	37N	1193.7
6.48561	37.7653	37N	1189.4
6.48776	37.7715	37N	1185.7
6.48404	37.7661	37N	1184.3
6.55364	37.7976	37N	1388
6.55559	37.7969	37N	1386.8
6.55818	37.8009	37N	1356.9
6.56703	37.8023	37N	1367.4
6.57113	37.8096	37N	1327.2
6.56821	37.8091	37N	1343.7
6.56875	37.7963	37N	1376
6.56865	37.7932	37N	1375.4
6.56865	37.7907	37N	1379.1
6.56573	37.7907	37N	1392.3
6.56476	37.7887	37N	1398.7
6.56476	37.7857	37N	1399.6
6.56368	37.7841	37N	1404.2
6.56411	37.7862	37N	1400.7
6.56357	37.7887	37N	1400.2
6.55634	37.7931	37N	1400
6.5544	37.7919	37N	1404.7
6.55192	37.7903	37N	1414.1
6.55073	37.7898	37N	1418.7
6.5571	37.7874	37N	1411.9
6.56368	37.7813	37N	1404.2
6.56606	37.7787	37N	1401.6
6.56746	37.7773	37N	1403.9
6.56821	37.7761	37N	1403.5
6.5571	37.7754	37N	1427
6.55526	37.7741	37N	1434.2
6.55494	37.7718	37N	1440.4
6.55947	37.7715	37N	1428.5
6.5598	37.7704	37N	1433.8
6.56141	37.7704	37N	1430.5
6.56174	37.7693	37N	1434.1
6.56303	37.7695	37N	1431.1
6.56347	37.7707	37N	1426.7
6.56724	37.7691	37N	1417.5
6.56368	37.7676	37N	1431.1
6.57394	37.7674	37N	1391.3
6.57653	37.769	37N	1401.1
6.57599	37.765	37N	1411.3
6.56357	37.7642	37N	1427.7
6.56422	37.7428	37N	1452.5
6.56379	37.7436	37N	1453.2
6.56336	37.7419	37N	1457.9
6.58462	37.751	37N	1401.8
6.56768	37.7466	37N	1444.8
6.57027	37.751	37N	1437.2
6.58343	37.769	37N	1373.5
6.58376	37.7667	37N	1377.4
6.57804	37.7727	37N	1389.8
6.58462	37.7735	37N	1377.4
6.55753	37.7477	37N	1454.1
6.55915	37.7478	37N	1447.2
6.55181	37.7499	37N	1466.8
6.55537	37.773	37N	1436.1
6.57113	37.7758	37N	1396.3
6.57081	37.753	37N	1432.4
6.57404	37.7567	37N	1426.9
6.59466	37.7534	37N	1394.3
6.59541	37.7513	37N	1397.4
6.59175	37.7537	37N	1390.8
6.59946	37.7479	37N	1415
6.43328	37.6838	37N	1802.2
6.43361	37.6859	37N	1773.1
6.43535	37.6863	37N	1829.5
6.436	37.6879	37N	1785.1
6.43741	37.692	37N	1803.9
6.43708	37.6943	37N	1749.1
6.43774	37.6967	37N	1674.8
6.43632	37.698	37N	1651.1
6.43611	37.7021	37N	1637.3
6.44164	37.7023	37N	1725.2
6.44523	37.7026	37N	1729.6
6.44479	37.6995	37N	1847.5
6.44577	37.6964	37N	1860.7
6.44989	37.7134	37N	1553.3
6.4588	37.7073	37N	1507.6
6.41396	37.6694	37N	2067.1
6.42362	37.6716	37N	2013.2
6.42395	37.6777	37N	1861.6
6.42134	37.6529	37N	2146.4
6.39583	37.6584	37N	2613.8
6.39116	37.6372	37N	2543.9
6.39322	37.6377	37N	2543.3
6.39561	37.6366	37N	2541.2
6.39648	37.6399	37N	2621.4
6.39116	37.6515	37N	2685.3
6.39181	37.6678	37N	2456.6
6.39007	37.6563	37N	2590.6
6.38975	37.6543	37N	2619.4
6.39007	37.6516	37N	2675.8
6.3853	37.6299	37N	2589.4
6.38714	37.6269	37N	2566.7
6.38606	37.6242	37N	2521.3
6.38671	37.6253	37N	2523.2
6.40223	37.6511	37N	2499.2
6.40701	37.6432	37N	2463.5
6.39235	37.632	37N	2514.1
6.41602	37.6519	37N	2200
6.41635	37.6397	37N	2374.4
6.33383	37.6419	37N	2585.8
6.34436	37.624	37N	2708.1
6.34577	37.6222	37N	2712.6
6.34653	37.619	37N	2600.8
6.33556	37.6075	37N	2680.9
6.33698	37.6074	37N	2710.9
6.33133	37.6175	37N	2651.4
6.36184	37.6072	37N	2701.5
6.3626	37.6038	37N	2741.9
6.35967	37.603	37N	2746.9
6.32959	37.6296	37N	2646.6
6.36542	37.6405	37N	2262.7
6.37292	37.6359	37N	2252.2
6.36684	37.6452	37N	2155.9
6.30342	37.6426	37N	2307.6
6.30396	37.6424	37N	2269.3
6.30486	37.6437	37N	2166.5
6.30874	37.6391	37N	2161.1
6.30781	37.6422	37N	2138.6
6.3081	37.6417	37N	2141.8
6.30961	37.6342	37N	2214.8
6.31067	37.6339	37N	2223.9
6.33024	37.6735	37N	2124.9
6.32872	37.6721	37N	2153.2
6.32796	37.6642	37N	2217.8
6.33654	37.7022	37N	1878.1
6.33882	37.7022	37N	1920.9
6.312	37.724	37N	1800.3
6.31287	37.7201	37N	1893
6.32004	37.7245	37N	1672.9
6.31862	37.7244	37N	1685.7
6.32872	37.717	37N	1741.1
6.32416	37.7163	37N	1787
6.32644	37.716	37N	1783.3
6.32764	37.7145	37N	1782.2
6.33318	37.715	37N	1709.9
6.33089	37.7215	37N	1540.8
6.34164	37.7142	37N	1946.4
6.34479	37.7131	37N	2025.7
6.34957	37.7131	37N	1941.7
6.35066	37.7124	37N	1964.2
6.34306	37.716	37N	1845.1
6.36043	37.7157	37N	1766.3
6.33708	37.712	37N	1755.3
6.33307	37.7173	37N	1668.5
6.32166	37.7237	37N	1662.8
6.31243	37.7185	37N	1904.3
6.31504	37.7173	37N	1889.9
6.35283	37.7145	37N	1819.1
6.35478	37.7154	37N	1817
6.37205	37.7089	37N	1684.8
6.37954	37.7107	37N	1659.3
6.3727	37.7023	37N	1763.3
6.37151	37.7124	37N	1651
6.39919	37.7089	37N	1740.2
6.39952	37.7059	37N	1817.6
6.39756	37.7045	37N	1808.7
6.39376	37.6951	37N	2012.7
6.39192	37.6933	37N	2045.5
6.39007	37.6951	37N	1939.6
6.3955	37.7002	37N	1927.3
6.39995	37.698	37N	1867.3
6.39094	37.6905	37N	2156.8
6.38899	37.691	37N	2066.9
6.37552	37.6817	37N	2140.6
6.37911	37.6853	37N	2106.9
6.3828	37.6838	37N	2165.9
6.37411	37.6902	37N	1904.2
6.41157	37.6877	37N	1877.6
6.41298	37.6893	37N	1918
6.41103	37.691	37N	1778.8
6.41363	37.6929	37N	1824.9
6.41374	37.6947	37N	1748.7
6.42623	37.705	37N	1540.2
6.43176	37.7165	37N	1495.5
6.40592	37.7113	37N	1743.2
6.46032	37.7095	37N	1494.9
6.46444	37.6933	37N	1526.1
6.46683	37.7246	37N	1435.6
6.45956	37.7279	37N	1404.5
6.44968	37.7199	37N	1503.7
6.44913	37.7242	37N	1464.6
6.45076	37.724	37N	1429.2
6.45185	37.7221	37N	1457.8
6.46802	37.7304	37N	1391.9
6.46813	37.706	37N	1553.9
6.47747	37.7162	37N	1493.8
6.48094	37.7149	37N	1508.5
6.48431	37.7143	37N	1527.3
6.4918	37.7298	37N	1561
6.49473	37.7469	37N	1340.2
6.49527	37.7447	37N	1365.3
6.49071	37.7098	37N	1590.3
6.49245	37.7081	37N	1604
6.50179	37.7083	37N	1757.6
6.47595	37.7254	37N	1488.2
6.4741	37.7254	37N	1490
6.45399	37.6416	37N	2129.8
6.4562	37.6403	37N	2270.4
6.45888	37.6467	37N	2271.2
6.45842	37.6487	37N	2224.2
6.45989	37.6458	37N	2337.2
6.46192	37.654	37N	2259.9
6.45104	37.6432	37N	2047.4
6.46367	37.6568	37N	2143.3
6.46626	37.6587	37N	2129.1
6.47022	37.6688	37N	1862.5
6.46829	37.6691	37N	1861.5
6.46875	37.6678	37N	1886.8
6.47271	37.6708	37N	1823.7
6.47327	37.6683	37N	1870.5
6.47428	37.6671	37N	1907.8
6.47391	37.6644	37N	1986.3
6.47336	37.6631	37N	2074.4
6.47373	37.6616	37N	2151.2
6.47585	37.6665	37N	1979.4
6.47613	37.669	37N	1918.1
6.47825	37.6684	37N	1942.9
6.48424	37.6744	37N	1851.1
6.48673	37.6757	37N	1863.1
6.48932	37.6571	37N	2250.8
6.49217	37.654	37N	2182.5
6.48286	37.6575	37N	2292.9
6.48443	37.6566	37N	2281.5
6.50297	37.6673	37N	2085.3
6.50121	37.6674	37N	2097.3
6.51081	37.6684	37N	2040
6.51422	37.6699	37N	2023.8
6.50942	37.6622	37N	2127.3
6.50868	37.6516	37N	2034
6.50795	37.6522	37N	2042.8
6.50712	37.6506	37N	2049.8
6.50555	37.648	37N	2072.6
6.49771	37.6523	37N	2133.1
6.49485	37.6525	37N	2147
6.50573	37.6602	37N	2116
6.50158	37.6542	37N	2117.8
6.50343	37.6545	37N	2097.7
6.51551	37.6628	37N	2103.3
6.52667	37.6704	37N	1977.3
6.52968	37.7615	37N	1336.1
6.53137	37.7602	37N	1353
6.51623	37.7619	37N	1290.2
6.52333	37.7526	37N	1362.7
6.52523	37.7513	37N	1387.4
6.53847	37.7575	37N	1419.8
6.52671	37.7458	37N	1451.1
6.52703	37.7424	37N	1487.4
6.52862	37.7555	37N	1455.1
6.5391	37.755	37N	1472.1
6.53688	37.7539	37N	1479.1
6.5354	37.7496	37N	1502.3
6.54111	37.7534	37N	1496.3
6.5193	37.7457	37N	1490.6
6.521	37.7446	37N	1482.1
6.5247	37.742	37N	1511.8
6.54461	37.7616	37N	1465.4
6.54821	37.7652	37N	1497.5
6.55563	37.6915	37N	1641.5
6.54824	37.6863	37N	1659.1
6.59709	37.7357	37N	1440.8
6.59893	37.7292	37N	1452.5
6.59806	37.7286	37N	1452.8
6.59774	37.7272	37N	1464.6
6.59958	37.7159	37N	1495.5
6.60143	37.7105	37N	1517.6
6.60023	37.7093	37N	1512.8
6.60542	37.7415	37N	1441.1
6.60624	37.7404	37N	1447.3
6.60677	37.7396	37N	1450.8
6.60807	37.7381	37N	1452.5
6.60872	37.7371	37N	1453.1
6.60199	37.7399	37N	1448.5
6.60365	37.731	37N	1473.2
6.59698	37.7232	37N	1470.7
6.59804	37.718	37N	1488.8
6.60052	37.7133	37N	1504.5
6.60152	37.7059	37N	1541.3
6.60748	37.7171	37N	1504.8
6.60695	37.7159	37N	1511.8
6.61279	37.7171	37N	1492.5
6.61238	37.7179	37N	1487.8
6.61126	37.7185	37N	1491.5
6.62826	37.7067	37N	1545.3
6.6269	37.7083	37N	1534.8
6.61693	37.7149	37N	1500.5
6.61746	37.7138	37N	1503.9
6.61905	37.7111	37N	1516.3
6.60187	37.7347	37N	1458.8
6.60305	37.7385	37N	1454.9
6.60494	37.7376	37N	1463.2
6.60654	37.7349	37N	1471.7
6.60559	37.7313	37N	1478.8
6.60612	37.7278	37N	1481
6.60235	37.7274	37N	1477.1
6.60365	37.7241	37N	1493.7
6.60642	37.7248	37N	1487.4
6.60518	37.7219	37N	1495.8
6.60282	37.7198	37N	1501.1
6.60341	37.7172	37N	1509.3
6.60725	37.7186	37N	1502.4
6.60447	37.7143	37N	1519.3
6.60365	37.7105	37N	1531.8
6.61085	37.7139	37N	1517.2
6.60719	37.7078	37N	1536.2
6.60837	37.7128	37N	1524.2
6.60955	37.7108	37N	1528.1
6.60689	37.6963	37N	1562.3
6.60276	37.6963	37N	1570.5
6.6004	37.6977	37N	1567.4
6.60825	37.7003	37N	1551.2
6.61521	37.6982	37N	1555.4
6.61598	37.7061	37N	1534.9
6.61923	37.6991	37N	1554.1
6.61085	37.7051	37N	1540.8
6.61899	37.7049	37N	1541.6
6.60813	37.6935	37N	1564.4
6.60972	37.6906	37N	1555.7
6.61203	37.6936	37N	1555.2
6.62129	37.6779	37N	1516.9
6.61433	37.6737	37N	1505.7
6.62171	37.6842	37N	1539.9
6.61752	37.6952	37N	1552.3
6.61327	37.6737	37N	1509.4
6.61604	37.6698	37N	1492.3
6.6151	37.6685	37N	1493
6.62336	37.6693	37N	1491.1
6.62236	37.6648	37N	1475.2
6.61161	37.6607	37N	1472.8
6.60884	37.6706	37N	1509.5
6.61043	37.6549	37N	1460.5
6.61533	37.6667	37N	1486.2
6.60807	37.6598	37N	1484.4
6.60671	37.6473	37N	1419.7
6.60807	37.6475	37N	1415.5
6.6086	37.6496	37N	1422.4
6.60719	37.6486	37N	1425.3
6.60689	37.6524	37N	1451.5
6.60937	37.6537	37N	1453.4
6.61268	37.6547	37N	1437.1
6.6014	37.6524	37N	1498.1
6.60099	37.6515	37N	1503.5
6.604	37.6515	37N	1481.1
6.603	37.65	37N	1496.6
6.61427	37.6546	37N	1424.8
6.61415	37.6538	37N	1423.1
6.60902	37.6449	37N	1400.3
6.61374	37.6587	37N	1456.6
6.61268	37.6621	37N	1468.7
6.60589	37.674	37N	1540.2
6.60736	37.674	37N	1532
6.61126	37.6734	37N	1509.5
6.60854	37.68	37N	1534.4
6.61291	37.6689	37N	1497.8
6.6115	37.6682	37N	1494
6.6073	37.6653	37N	1504.6
6.59597	37.6607	37N	1566
6.59426	37.6623	37N	1604.3
6.59278	37.6652	37N	1663.2
6.59072	37.6755	37N	1634
6.5893	37.6759	37N	1647.3
6.58836	37.6739	37N	1660.1
6.58564	37.6709	37N	1700
6.58358	37.669	37N	1723.5
6.58245	37.6712	37N	1726.1
6.58352	37.6734	37N	1702.6
6.58676	37.6792	37N	1658.3
6.59337	37.6792	37N	1604.8
6.59733	37.6801	37N	1583.4
6.59568	37.6835	37N	1594.5
6.5978	37.6842	37N	1578.8
6.59768	37.6878	37N	1591.2
6.59414	37.6888	37N	1607.6
6.59585	37.689	37N	1601.9
6.58517	37.6901	37N	1579.2
6.58369	37.6879	37N	1590
6.59898	37.6851	37N	1580.3
6.60069	37.6885	37N	1578.8
6.60866	37.6871	37N	1550.7
6.60819	37.6834	37N	1540.9
6.61344	37.6862	37N	1538.6
6.61527	37.6932	37N	1545.8
6.60849	37.6986	37N	1557
6.60719	37.7057	37N	1538
6.6086	37.7064	37N	1537.4
6.61297	37.7074	37N	1531.7
6.61043	37.7102	37N	1525.7
6.59904	37.7016	37N	1546.7
6.57785	37.7049	37N	1596.3
6.57785	37.6992	37N	1622.3
6.57986	37.6944	37N	1606.1
6.57508	37.6958	37N	1633.4
6.58735	37.699	37N	1562.8
6.58328	37.7108	37N	1558.6
6.57549	37.7171	37N	1510.5
6.56923	37.699	37N	1579.3
6.58098	37.6904	37N	1591.7
6.57862	37.6891	37N	1606.1
6.57939	37.6967	37N	1611.7
6.56947	37.717	37N	1511.3
6.57177	37.7156	37N	1503.7
6.57124	37.7118	37N	1525.6
6.59515	37.7071	37N	1539.8
6.57992	37.7301	37N	1466
6.57939	37.728	37N	1477.3
6.57862	37.7266	37N	1480.5
6.57897	37.7151	37N	1527.7
6.57809	37.7175	37N	1514.7
6.58966	37.7271	37N	1475
6.58511	37.713	37N	1544.9
6.58393	37.714	37N	1541.5
6.57761	37.7013	37N	1616.4
6.58434	37.7025	37N	1583.4
6.52939	37.7209	37N	1635.7
6.53279	37.7127	37N	1643.6
6.53128	37.7139	37N	1656.5
6.54507	37.7098	37N	1609.5
6.54129	37.7073	37N	1630.9
6.53884	37.7014	37N	1617.6
6.55725	37.7273	37N	1530.6
6.5548	37.7252	37N	1544.3
6.55584	37.7213	37N	1539.5
6.56047	37.7181	37N	1542
6.54545	37.7341	37N	1534.5
6.54346	37.7396	37N	1538.5
6.52316	37.7368	37N	1501.2
6.51891	37.7365	37N	1481.7
6.52344	37.7338	37N	1526.1
6.52439	37.7081	37N	1696
6.52117	37.708	37N	1713.8
6.51636	37.6936	37N	1745.3
6.51305	37.697	37N	1771.6
6.51305	37.6944	37N	1767.8
6.54176	37.7111	37N	1613.3
6.56283	37.7204	37N	1528
6.565	37.7214	37N	1515.9
6.56604	37.7279	37N	1504.1
6.56774	37.7325	37N	1480.4
6.55414	37.7356	37N	1496.5
6.55716	37.7377	37N	1482.4
6.55697	37.7437	37N	1461.7
6.50474	37.7293	37N	1492
6.51059	37.7218	37N	1595.3
6.50795	37.7181	37N	1582.9
6.49709	37.7058	37N	1644.8
6.48509	37.7	37N	1560.6
6.51239	37.7128	37N	1644.5
6.51428	37.7127	37N	1646.6
6.52146	37.7349	37N	1504.7
6.51853	37.6955	37N	1735.7
6.52032	37.6898	37N	1739
6.51957	37.6888	37N	1749.8
6.44406	37.695	37N	1882.3
6.4557	37.6941	37N	1631.9
6.46279	37.7022	37N	1508.5
6.45284	37.7011	37N	1588
6.45242	37.6831	37N	1645.1
6.44872	37.6819	37N	1701.9
6.44153	37.6823	37N	1871.5
6.44015	37.6802	37N	1905.4
6.43803	37.6771	37N	1889.2
6.42185	37.6636	37N	2123.3
6.44163	37.687	37N	1774.3
6.41116	37.6591	37N	2378.2
6.40947	37.6591	37N	2391
6.42576	37.6633	37N	2031.1
6.4374	37.6698	37N	1787.8
6.41836	37.6821	37N	1860.6
6.41561	37.688	37N	1826.4
6.41603	37.6937	37N	1786.9
6.41825	37.6802	37N	1849.1
6.40524	37.7088	37N	1723.5
6.40154	37.7041	37N	1842.4
6.40228	37.701	37N	1814.5
6.38323	37.6756	37N	2448.5
6.37932	37.6721	37N	2235.5
6.37614	37.6757	37N	2394
6.38376	37.6461	37N	2519.6
6.37255	37.6544	37N	2149.7
6.39434	37.6521	37N	2613.4
6.37701	37.6497	37N	2316.1
6.38183	37.6389	37N	2415.8
6.38083	37.6452	37N	2367.1
6.37176	37.6572	37N	2130.2
6.37254	37.6384	37N	2232.7
6.37495	37.6551	37N	2284.8
6.351	37.6524	37N	2078.4
6.35497	37.6276	37N	2283.1
6.36992	37.6282	37N	2440
6.37772	37.6247	37N	2308.9
6.37353	37.6234	37N	2421.5
6.34831	37.6481	37N	2170.9
6.34824	37.6571	37N	2049.3
6.37226	37.6412	37N	2173.1
6.34604	37.6208	37N	2677.9
6.34746	37.6291	37N	2456.6
6.33973	37.6395	37N	2448
6.33952	37.6367	37N	2447.8
6.34576	37.6399	37N	2252.4
6.35128	37.6302	37N	2306
6.35093	37.6402	37N	2137.6
6.34434	37.6436	37N	2276.1
6.35199	37.6474	37N	2059
6.3106	37.6299	37N	2311.1
6.30926	37.6291	37N	2339.5
6.3162	37.6254	37N	2444.6
6.31514	37.6227	37N	2524.5
6.31925	37.6249	37N	2347.8
6.34172	37.6232	37N	2755.5
6.32896	37.6176	37N	2653.5
6.34356	37.6178	37N	2685.9
6.33732	37.6215	37N	2720.7
6.32577	37.6144	37N	2614.9
6.32152	37.6175	37N	2547.6
6.32152	37.62	37N	2497.8
6.33215	37.6193	37N	2683.5
6.32613	37.6502	37N	2548.2
6.32648	37.6473	37N	2466.8
6.32995	37.6539	37N	2385
6.33477	37.6544	37N	2212.2
6.3352	37.6463	37N	2393.6
6.34009	37.6466	37N	2303.4
6.33605	37.6406	37N	2574.3
6.32046	37.6323	37N	2375
6.31989	37.6393	37N	2400.3
6.31968	37.6216	37N	2409.1
6.30749	37.6493	37N	2079.7
6.31514	37.6498	37N	2461.6
6.31953	37.6439	37N	2510.6
6.30437	37.6357	37N	2384.6
6.3189	37.6762	37N	1979.1
6.32939	37.6712	37N	2113.6
6.33257	37.6744	37N	2036.1
6.3325	37.6728	37N	2021.6
6.33959	37.6614	37N	2094.4
6.33831	37.656	37N	2175.6
6.34009	37.6555	37N	2205.8
6.34384	37.6546	37N	2155.5
6.34526	37.6538	37N	2101
6.33746	37.6781	37N	1971
6.3437	37.6928	37N	2094.4
6.34122	37.6907	37N	2035.2
6.35242	37.6784	37N	1961.2
6.35398	37.6796	37N	1978
6.34958	37.6643	37N	1968.2
6.35157	37.6621	37N	1975.5
6.35242	37.6566	37N	2007.2
6.3622	37.6883	37N	2037.5
6.36255	37.6868	37N	2013.8
6.36361	37.6894	37N	2053.6
6.36262	37.6953	37N	1975.6
6.35717	37.6985	37N	2037.7
6.34788	37.6845	37N	1991.5
6.36638	37.6684	37N	2079.8
6.33137	37.6868	37N	1844.7
6.34533	37.6768	37N	1907.5
6.3471	37.6765	37N	1914.5
6.34894	37.6759	37N	1915.4
6.35008	37.6747	37N	1919.2
6.351	37.6733	37N	1925.8
6.35121	37.6726	37N	1929.1
6.35022	37.6678	37N	1944.8
6.35057	37.6665	37N	1949.8
6.3522	37.6641	37N	1958.1
6.3532	37.6623	37N	1963.5
6.35348	37.6598	37N	1976.3
6.35454	37.6546	37N	2002.6
6.35454	37.6535	37N	2007.7
6.34243	37.6527	37N	2204.2
6.31571	37.6401	37N	2270.3
6.31535	37.6388	37N	2237.2
6.31493	37.6376	37N	2193.4
6.31075	37.6354	37N	2186.4
6.31053	37.6384	37N	2138.2
6.30954	37.6395	37N	2124.3
6.3527	37.6721	37N	1930.2
6.35348	37.6704	37N	1933.6
6.35334	37.6686	37N	1938.7
6.35539	37.6665	37N	1950.3
6.35617	37.6656	37N	1953.2
6.35348	37.6573	37N	1989.4
6.33943	37.7564	37N	1307
6.34345	37.7549	37N	1309.6
6.34665	37.754	37N	1309.7
6.35007	37.7534	37N	1302.8
6.31799	37.7647	37N	1289.7
6.31456	37.7669	37N	1288.7
6.32632	37.7612	37N	1291.1
6.33151	37.7477	37N	1321.4
6.33349	37.7463	37N	1330.1
6.33746	37.736	37N	1380.1
6.34576	37.7593	37N	1301.4
6.34496	37.7589	37N	1296.4
6.34576	37.7582	37N	1300.3
6.34628	37.7595	37N	1305.7
6.35271	37.7538	37N	1297.1
6.37298	37.7678	37N	1285.1
6.37203	37.7649	37N	1264.6
6.37024	37.7505	37N	1254.1
6.37104	37.7498	37N	1254.7
6.37633	37.7488	37N	1262
6.3735	37.7613	37N	1238.3
6.39159	37.7522	37N	1247.2
6.39112	37.7519	37N	1246
6.39083	37.7512	37N	1246.6
6.39371	37.7595	37N	1233.1
6.39315	37.7599	37N	1237.5
6.39348	37.7605	37N	1249.6
6.41034	37.7532	37N	1218.3
6.44581	37.7478	37N	1228.3
6.44328	37.7457	37N	1239.2
6.44159	37.745	37N	1246
6.44061	37.744	37N	1249.8
6.43951	37.7427	37N	1254.2
6.43756	37.7399	37N	1265.3
6.43574	37.7381	37N	1276.1
6.43522	37.737	37N	1278.2
6.43346	37.7345	37N	1289
6.43359	37.7327	37N	1296
6.43379	37.7313	37N	1311.6
6.43379	37.7299	37N	1316.1
6.64022	37.6999	37N	1605.3
6.63906	37.699	37N	1599.2
6.63244	37.6958	37N	1579.8
6.62271	37.702	37N	1542.9
6.62243	37.7015	37N	1546.1
6.61661	37.698	37N	1556.7
6.61386	37.6975	37N	1556.8
6.61242	37.697	37N	1556.1
6.60976	37.6961	37N	1560.7
6.60333	37.6953	37N	1571.6
6.61572	37.6918	37N	1540.9
6.61591	37.688	37N	1529.5
6.60189	37.6783	37N	1566.5
6.59858	37.6799	37N	1577.5
6.61125	37.6716	37N	1506.8
6.61121	37.6754	37N	1515.2
6.57471	37.8201	37N	1289.2
6.57442	37.8187	37N	1295.4
6.57349	37.8182	37N	1299.3
6.57263	37.8099	37N	1319.5
6.57013	37.7934	37N	1362.5
6.56999	37.7917	37N	1366.1
6.51935	37.7806	37N	1211
6.52049	37.779	37N	1225
6.52364	37.7737	37N	1312.7
6.52407	37.7727	37N	1321.4
6.53408	37.7646	37N	1406.9
6.52958	37.765	37N	1375.7
6.52679	37.7655	37N	1367.3
6.5255	37.7686	37N	1358
6.52293	37.7761	37N	1280.5
6.53551	37.7627	37N	1425.2
6.54238	37.7577	37N	1445.2
6.5446	37.7578	37N	1476
6.54567	37.7582	37N	1485
6.53902	37.7462	37N	1533.7
6.53301	37.7396	37N	1580.6
6.53387	37.7392	37N	1586.3
6.52681	37.6878	37N	1728.3
6.5284	37.6885	37N	1721.9
6.53112	37.6886	37N	1713
6.53402	37.6884	37N	1703.6
6.54034	37.685	37N	1699.3
6.54513	37.6984	37N	1602.4
6.54465	37.6978	37N	1607.8
6.54595	37.6807	37N	1719.5
6.54719	37.6804	37N	1717.6
6.55381	37.6772	37N	1693
6.5521	37.6912	37N	1631.1
6.5534	37.6916	37N	1636.9
6.54383	37.6759	37N	1798.6
6.53147	37.6683	37N	1958.5
6.53937	37.8085	37N	1208.8
6.54034	37.8085	37N	1211.4
6.54122	37.8085	37N	1213.8
6.54211	37.8103	37N	1214.3
6.53864	37.8054	37N	1212.6
6.5405	37.8072	37N	1215.9
6.53385	37.8047	37N	1200.1
6.53385	37.8045	37N	1200.8
6.53397	37.8041	37N	1202.3
6.53579	37.8006	37N	1210.3
6.537	37.8024	37N	1211.5
6.53895	37.8017	37N	1220.8
6.54138	37.81	37N	1212.9
6.5415	37.8079	37N	1216.5
6.53804	37.8047	37N	1211.4
6.53867	37.8047	37N	1214
6.51882	37.7852	37N	1201.1
6.51982	37.7859	37N	1201.6
6.52031	37.7861	37N	1201.6
6.52343	37.7887	37N	1200.7
6.52489	37.7874	37N	1208.3
6.52702	37.7872	37N	1223.2
6.52765	37.7871	37N	1228.7
6.52841	37.787	37N	1240.2
6.5279	37.787	37N	1234.5
6.52796	37.7866	37N	1242
6.52732	37.787	37N	1228.2
6.5183	37.7849	37N	1199.5
6.51879	37.7803	37N	1209.8
6.51836	37.7797	37N	1209.5
6.51769	37.7794	37N	1207.4
6.5156	37.7778	37N	1206.9
6.5132	37.7765	37N	1206.6
6.52073	37.7818	37N	1213.2
6.50846	37.7759	37N	1201.1
6.5081	37.7757	37N	1200.2
6.50388	37.7749	37N	1194.1
6.50522	37.7742	37N	1199.2
6.51493	37.7777	37N	1204.2
6.50889	37.7747	37N	1204.2
6.50874	37.7742	37N	1206.5
6.5108	37.7773	37N	1201.4
6.51047	37.7753	37N	1210
6.50206	37.773	37N	1193.8
6.50078	37.772	37N	1192.6
6.50048	37.7718	37N	1192.4
6.50148	37.7702	37N	1196.7
6.50163	37.77	37N	1197.2
6.46667	37.7495	37N	1216.6
6.46447	37.7477	37N	1221
6.46288	37.7483	37N	1220.7
6.45524	37.7484	37N	1217.1
6.45592	37.7456	37N	1223.9
6.45539	37.7439	37N	1226.7
6.45456	37.744	37N	1226.9
6.45357	37.744	37N	1225.8
6.45274	37.744	37N	1227.3
6.45153	37.7433	37N	1236.8
6.451	37.743	37N	1236.4
6.45955	37.7433	37N	1230.1
6.45175	37.7476	37N	1219.7
6.45206	37.7469	37N	1221.7
6.4513	37.7461	37N	1225.4
6.45175	37.7456	37N	1225
6.45289	37.7449	37N	1223.8
6.45395	37.7447	37N	1224.7
6.45683	37.7457	37N	1223.2
6.46145	37.7494	37N	1218
6.46039	37.7488	37N	1218.9
6.45084	37.7449	37N	1230.1
6.45486	37.743	37N	1230
6.45456	37.7483	37N	1216.6
6.44933	37.7409	37N	1246.5
6.44978	37.7388	37N	1254.5
6.44925	37.7384	37N	1257.6
6.44161	37.7506	37N	1232
6.44153	37.7499	37N	1234.4
6.44214	37.75	37N	1233.3
6.44252	37.75	37N	1232.9
6.43706	37.7465	37N	1246.3
6.43449	37.7397	37N	1272.1
6.43426	37.7406	37N	1268.3
6.43509	37.7436	37N	1257.1
6.43328	37.7392	37N	1271.9
6.4335	37.7397	37N	1271
6.43585	37.7436	37N	1256.7
6.43366	37.7385	37N	1275.9
6.39057	37.7471	37N	1260.9
6.39246	37.747	37N	1258
6.39246	37.7471	37N	1257.4
6.39481	37.7483	37N	1253.9
6.39473	37.7468	37N	1260.2
6.3942	37.7463	37N	1261.2
6.39382	37.7459	37N	1262.3
6.39382	37.7437	37N	1268.8
6.39488	37.7428	37N	1274
6.39602	37.7439	37N	1269.5
6.39564	37.7445	37N	1267.7
6.39329	37.7427	37N	1271.8
6.39329	37.742	37N	1277.1
6.39375	37.7418	37N	1277.9
6.39557	37.7418	37N	1276.6
6.39625	37.7402	37N	1280
6.39504	37.74	37N	1284.9
6.39428	37.7392	37N	1287.4
6.39201	37.7362	37N	1302
6.39246	37.7385	37N	1292.4
6.39284	37.7397	37N	1288.2
6.39178	37.7455	37N	1265
6.3964	37.7468	37N	1260.3
6.39587	37.746	37N	1263.2
6.39579	37.7453	37N	1265.3
6.39186	37.7465	37N	1262
6.38905	37.7489	37N	1257.9
6.38686	37.7481	37N	1264.3
6.38368	37.7481	37N	1263.5
6.37035	37.7253	37N	1349.8
6.37111	37.7254	37N	1353.6
6.37133	37.7244	37N	1358.6
6.3708	37.7238	37N	1356.7
6.36936	37.7274	37N	1339.3
6.36929	37.7287	37N	1333.9
6.36936	37.7239	37N	1354.2
6.36861	37.7249	37N	1348.4
6.34225	37.7273	37N	1428.2
6.34119	37.7268	37N	1449.9
6.34043	37.7262	37N	1453.3
6.34021	37.7257	37N	1454.1
6.33975	37.7253	37N	1451.8
6.34096	37.7246	37N	1470
6.34074	37.7241	37N	1472.8
6.34111	37.7237	37N	1478
6.33922	37.7228	37N	1467.7
6.33551	37.7643	37N	1306.3
6.33543	37.7638	37N	1306.9
6.33498	37.7639	37N	1307.2
6.33437	37.7643	37N	1304
6.3343	37.764	37N	1303.7
6.33483	37.7622	37N	1304.9
6.33551	37.7621	37N	1305.8
6.33536	37.7627	37N	1306.8
6.33475	37.7627	37N	1305.7
6.33422	37.7628	37N	1302.7
6.32082	37.766	37N	1292.8
6.32203	37.7654	37N	1293
6.32324	37.7648	37N	1294.8
6.32438	37.7642	37N	1296.9
6.3243	37.7654	37N	1295.4
6.32498	37.7676	37N	1293.9
6.32589	37.7672	37N	1293.8
6.32574	37.7658	37N	1295
6.32582	37.7647	37N	1294
6.33445	37.757	37N	1310.3
6.34884	37.7019	37N	2067.4
6.36921	37.7105	37N	1742.1
6.36951	37.7096	37N	1746.1
6.54635	37.6797	37N	1726.9
6.5563	37.6674	37N	1792.6
6.50928	37.8218	37N	1180.8
6.50987	37.8185	37N	1179.4
6.50775	37.8161	37N	1179.7
6.50834	37.8121	37N	1180.5
6.50964	37.8085	37N	1177.9
6.51153	37.8085	37N	1179.4
6.51129	37.806	37N	1176.9
6.51153	37.8031	37N	1176
6.51094	37.7975	37N	1176
6.50987	37.7956	37N	1176
6.51129	37.7939	37N	1178.5
6.50964	37.7916	37N	1179.4
6.50857	37.7895	37N	1177.7
6.50798	37.7882	37N	1176.9
6.50739	37.7864	37N	1179.6
6.50586	37.785	37N	1177.1
6.50397	37.7815	37N	1178.9
6.50102	37.7782	37N	1181.8
6.49783	37.776	37N	1181.2
6.49405	37.7758	37N	1181.4
6.49134	37.7752	37N	1183.9
6.51519	37.8038	37N	1179.6
6.51176	37.7902	37N	1179.6
6.62531	37.7064	37N	1546.5
6.62713	37.7056	37N	1553.8
6.62726	37.7044	37N	1556.8
6.61047	37.7009	37N	1550.9
6.61144	37.7005	37N	1553.4
6.61743	37.6993	37N	1554.1
6.61808	37.7	37N	1551.8
6.62576	37.6945	37N	1566
6.62602	37.6929	37N	1564.6
6.62863	37.695	37N	1573.6
6.63045	37.6942	37N	1574
6.61235	37.6999	37N	1555.3
6.6132	37.6815	37N	1531.3
6.62055	37.6807	37N	1527.8
6.61769	37.6827	37N	1524.8
6.61717	37.6846	37N	1525.3
6.62283	37.6952	37N	1562
6.61528	37.7	37N	1554.3
6.60552	37.7054	37N	1541.4
6.60454	37.7062	37N	1542.1
6.62075	37.6663	37N	1482
6.62186	37.6691	37N	1493.3
6.62205	37.6704	37N	1496.4
6.61802	37.6714	37N	1486.4
6.61405	37.6642	37N	1476.2
6.5727	37.7933	37N	1356.4
6.57926	37.7807	37N	1362
6.58078	37.7787	37N	1360.8
6.582	37.7764	37N	1363.2
6.5817	37.7675	37N	1386.7
6.58017	37.7661	37N	1398.1
6.57788	37.7625	37N	1417.1
6.57133	37.7657	37N	1390.3
6.57178	37.7609	37N	1412.5
6.5669	37.7508	37N	1437.2
6.55882	37.7505	37N	1449.1
6.55745	37.7517	37N	1450.1
6.5547	37.7509	37N	1459.2
6.56096	37.7528	37N	1438.3
6.56279	37.7727	37N	1420.3
6.56547	37.7749	37N	1410.1
6.57154	37.7854	37N	1383.6
6.56985	37.8046	37N	1351.4
6.58128	37.7472	37N	1415.5
6.57803	37.7763	37N	1378.9
6.57366	37.8145	37N	1308.5
6.56618	37.8101	37N	1346.7
6.49444	37.6492	37N	2160.4
6.49444	37.6477	37N	2165.8
6.49507	37.6463	37N	2153.7
6.49408	37.6457	37N	2149.8
6.5024	37.6522	37N	2126.9
6.50338	37.653	37N	2120.4
6.50007	37.6593	37N	2200
6.50427	37.6613	37N	2155.5
6.51607	37.6501	37N	1965.2
6.50258	37.6498	37N	2131.5
6.52707	37.6604	37N	1866.8
6.52483	37.6624	37N	1955.7
6.52179	37.6624	37N	1965.9
6.51887	37.6315	37N	2111.3
6.52	37.6302	37N	2045.7
6.52095	37.6301	37N	2069.9
6.52162	37.6289	37N	2017.9
6.52254	37.6267	37N	1937.5
6.5254	37.6289	37N	2152.3
6.51962	37.6339	37N	2129.3
6.53393	37.6382	37N	2203.5
6.53227	37.6395	37N	2205.3
6.5315	37.6404	37N	2211.8
6.53097	37.642	37N	2210.9
6.53248	37.6427	37N	2208.2
6.53382	37.6431	37N	2188.4
6.53534	37.6427	37N	2176.9
6.53587	37.6398	37N	2208.9
6.53213	37.6525	37N	1962.6
6.53273	37.6528	37N	1951.9
6.53269	37.6479	37N	2049.1
6.53907	37.644	37N	2125.8
6.54133	37.6596	37N	1810.2
6.542	37.6595	37N	1804.5
6.54708	37.659	37N	1882.9
6.54764	37.6585	37N	1886.4
6.55166	37.6614	37N	1838.7
6.54926	37.6685	37N	1743.2
6.55804	37.6706	37N	1737
6.5586	37.6707	37N	1730.9
6.55931	37.6645	37N	1812.6
6.5592	37.6804	37N	1665.3
6.55603	37.678	37N	1691.7
6.54828	37.6768	37N	1727.3
6.5457	37.6714	37N	1749
6.54507	37.6718	37N	1763.5
6.54627	37.6709	37N	1734.4
6.54715	37.6649	37N	1790.9
6.5481	37.6631	37N	1808.8
6.54528	37.6708	37N	1749
6.54828	37.6749	37N	1729.6
6.55272	37.665	37N	1826.9
6.56248	37.6755	37N	1673.5
6.5641	37.6746	37N	1669.5
6.56467	37.6777	37N	1649.4
6.57098	37.6969	37N	1608.7
6.57027	37.6905	37N	1636.2
6.57105	37.6922	37N	1637.4
6.56446	37.682	37N	1652
6.56988	37.6856	37N	1641.5
6.57965	37.6894	37N	1600.7
6.57605	37.687	37N	1613.7
6.583	37.6947	37N	1588.1
6.57619	37.6973	37N	1633.8
6.57683	37.6931	37N	1623.2
6.57531	37.6947	37N	1630.7
