# Supplementary material for: Spatiotemporal dynamics of land use land cover change and its drivers in the western part of Lake Abaya, Ethiopia
Source: PeerJ. 2024 Sep 18;12:e17892. doi: 10.7717/peerj.17892 (PMC11416075; doi:10.7717/peerj.17892)
Supplement: Supplemental Information 4 [file peerj-12-17892-s004.xlsx]

## Sheet: Sheet1
Latitude	Longitude	utm_zone	Altitude (m)
6.49689	37.8183	37N	1176
6.50129	37.8057	37N	1176
6.50056	37.7939	37N	1176
6.48956	37.7828	37N	1176
6.48002	37.7799	37N	1176
6.47049	37.7821	37N	1176
6.46169	37.7828	37N	1176
6.44482	37.7806	37N	1176
6.43529	37.7762	37N	1176
6.41622	37.7747	37N	1176
6.40228	37.7806	37N	1176
6.39422	37.7902	37N	1176
6.38321	37.7932	37N	1176
6.36634	37.7969	37N	1176
6.35827	37.7932	37N	1176
6.34434	37.7961	37N	1176
6.38835	37.8028	37N	1176
6.39935	37.7961	37N	1176
6.40448	37.805	37N	1176
6.42869	37.8087	37N	1176
6.42575	37.8028	37N	1176
6.41695	37.7917	37N	1176
6.42649	37.7828	37N	1176
6.44116	37.7887	37N	1176
6.44189	37.8028	37N	1176
6.45436	37.8109	37N	1176
6.47196	37.8131	37N	1176
6.48516	37.8153	37N	1176
6.49249	37.8079	37N	1176
6.48882	37.7924	37N	1176
6.46242	37.7924	37N	1176
6.44996	37.7917	37N	1176
6.45069	37.7998	37N	1176
6.47122	37.8006	37N	1176
6.48516	37.8006	37N	1176
6.51531	37.8046	37N	1178.7
6.51453	37.8002	37N	1179.4
6.50906	37.7872	37N	1183.4
6.50718	37.785	37N	1181.3
6.50452	37.7818	37N	1179.9
6.5014	37.7787	37N	1183.2
6.50015	37.7776	37N	1181.1
6.49624	37.775	37N	1182.9
6.48529	37.7706	37N	1182.6
6.48279	37.7699	37N	1179.8
6.47998	37.7688	37N	1180
6.47607	37.7716	37N	1179.4
6.47498	37.7705	37N	1180.9
6.47388	37.7722	37N	1178.8
6.47247	37.7708	37N	1181.9
6.51078	37.7892	37N	1182.6
6.50968	37.7909	37N	1179
6.51187	37.7919	37N	1179.4
6.51641	37.7928	37N	1184
6.50703	37.8141	37N	1180.1
6.50937	37.8098	37N	1178.4
6.51156	37.8109	37N	1180.6
6.38725	37.7854	37N	1183.8
6.38911	37.786	37N	1183.3
6.39172	37.7853	37N	1183.6
6.39396	37.7844	37N	1184
6.39685	37.7808	37N	1180.3
6.39928	37.7736	37N	1182.6
6.40133	37.7733	37N	1181.6
6.40534	37.772	37N	1182.9
6.40702	37.771	37N	1179.8
6.41028	37.7695	37N	1182.2
6.41168	37.7699	37N	1182
6.41252	37.7694	37N	1181.7
6.42501	37.7702	37N	1181.5
6.4265	37.7702	37N	1183
6.41942	37.7694	37N	1182.8
6.42156	37.7697	37N	1181.5
6.38165	37.7872	37N	1181.7
6.38249	37.7868	37N	1182.4
6.38464	37.7859	37N	1180.8
6.38622	37.7857	37N	1180.8
6.39079	37.787	37N	1179.8
6.36524	37.7911	37N	1183.8
6.36263	37.7891	37N	1181.8
6.36198	37.7883	37N	1183.8
6.35415	37.789	37N	1184.6
6.35872	37.7872	37N	1184
6.35629	37.7882	37N	1182.7
6.33102	37.7975	37N	1181.9
6.3327	37.7963	37N	1181.5
6.33391	37.7943	37N	1181.4
6.33578	37.7936	37N	1181.8
6.34343	37.7919	37N	1182.1
6.34576	37.7915	37N	1183.5
6.34744	37.7907	37N	1182.7
6.34939	37.7899	37N	1181.2
6.33242	37.7975	37N	1176.8
6.33345	37.7968	37N	1176.7
6.33475	37.7951	37N	1177.4
6.33662	37.7941	37N	1176.8
6.33867	37.7932	37N	1177.1
6.34044	37.793	37N	1176.8
6.3424	37.7926	37N	1179.5
6.34454	37.7926	37N	1179.6
6.34594	37.7921	37N	1180.1
6.34725	37.7917	37N	1178.2
6.34921	37.7907	37N	1176.8
6.35089	37.7906	37N	1178.2
6.35256	37.7904	37N	1181.9
6.35406	37.7896	37N	1181.5
6.35769	37.7884	37N	1181.2
6.35984	37.788	37N	1181.6
6.36207	37.789	37N	1179.4
6.36273	37.7905	37N	1178.4
6.36543	37.7917	37N	1181.1
6.38175	37.7884	37N	1176.9
6.38277	37.7875	37N	1177.3
6.38417	37.7872	37N	1177
6.38529	37.7866	37N	1176.4
6.38622	37.7869	37N	1176
6.38809	37.7869	37N	1177.6
6.392	37.7867	37N	1176.6
6.39322	37.7859	37N	1176.5
6.3948	37.7849	37N	1179.8
6.39555	37.7839	37N	1179.5
6.39704	37.782	37N	1179.3
6.3976	37.7804	37N	1179.7
6.39741	37.7783	37N	1176.2
6.39778	37.7765	37N	1183.1
6.39862	37.7753	37N	1179.2
6.39974	37.7746	37N	1177.6
6.40235	37.7742	37N	1181.3
6.40431	37.7733	37N	1179.8
6.40636	37.7725	37N	1181.4
6.40729	37.7717	37N	1178.7
6.40907	37.7709	37N	1183.2
6.41158	37.7707	37N	1176.9
6.41382	37.7704	37N	1179.1
6.4155	37.7703	37N	1180.8
6.41988	37.7702	37N	1181.2
6.42333	37.7703	37N	1180.6
6.42529	37.7709	37N	1179.5
6.42762	37.7707	37N	1180.7
6.42986	37.7706	37N	1181.9
6.43247	37.7707	37N	1177.7
6.43443	37.77	37N	1180.5
6.43592	37.77	37N	1180.2
6.43704	37.7703	37N	1179.4
6.43871	37.7703	37N	1181.7
6.44049	37.7707	37N	1183.8
6.4416	37.7707	37N	1184.9
6.44393	37.7715	37N	1183.1
6.44599	37.7729	37N	1180.9
6.44701	37.7735	37N	1181.2
6.44804	37.7756	37N	1177.8
6.4499	37.7767	37N	1177.6
6.45242	37.7774	37N	1180.1
6.45158	37.7748	37N	1182
6.4499	37.7739	37N	1182.6
6.45521	37.7755	37N	1182.8
6.45382	37.7767	37N	1181
6.45577	37.7767	37N	1180.8
6.45587	37.7785	37N	1177.1
6.45372	37.7782	37N	1180.2
6.45801	37.7785	37N	1179.5
6.46053	37.7779	37N	1179.3
6.4623	37.7779	37N	1179.2
6.46333	37.7777	37N	1179.8
6.46062	37.7758	37N	1182.5
6.45932	37.7766	37N	1182.2
6.46463	37.7777	37N	1181.6
6.46743	37.7779	37N	1182.2
6.46873	37.7774	37N	1179.7
6.46985	37.776	37N	1176.8
6.47097	37.7754	37N	1179.4
6.47246	37.7748	37N	1177.9
6.47358	37.7742	37N	1179.7
6.47283	37.773	37N	1178.9
6.47181	37.7735	37N	1178.6
6.46985	37.7745	37N	1181.4
6.47078	37.7722	37N	1180
6.46976	37.7717	37N	1181.2
6.47013	37.7706	37N	1182.4
6.47544	37.7727	37N	1179.4
6.4774	37.7727	37N	1180.1
6.47889	37.7719	37N	1180.4
6.4802	37.7719	37N	1178.4
6.48169	37.7714	37N	1178.7
6.48365	37.7712	37N	1180.4
6.48533	37.772	37N	1180.4
6.48738	37.7737	37N	1182.3
6.48794	37.7742	37N	1180
6.49083	37.7752	37N	1183.9
6.49157	37.7752	37N	1184.1
6.49334	37.776	37N	1182.7
6.49455	37.7763	37N	1178
6.49502	37.7759	37N	1179.8
6.49726	37.7762	37N	1180.2
6.49856	37.777	37N	1181.2
6.49977	37.7782	37N	1179.9
6.50266	37.7813	37N	1177.1
6.50471	37.7851	37N	1176
6.50611	37.787	37N	1176.2
6.50574	37.7874	37N	1176
6.50714	37.7885	37N	1176
6.50723	37.7899	37N	1176
6.50742	37.7915	37N	1176
6.50788	37.7909	37N	1176
6.50891	37.7929	37N	1176
6.50835	37.7937	37N	1176
6.50966	37.7946	37N	1176
6.50984	37.7963	37N	1176
6.50919	37.7979	37N	1176
6.50919	37.8015	37N	1176
6.51059	37.801	37N	1176
6.51077	37.8001	37N	1176
6.51077	37.7983	37N	1176
6.51199	37.8009	37N	1176.7
6.51133	37.8031	37N	1176
6.51161	37.8046	37N	1176
6.51245	37.8061	37N	1179.2
6.51115	37.8055	37N	1176.2
6.50984	37.8057	37N	1176
6.50872	37.806	37N	1176
6.50816	37.8054	37N	1176
6.50816	37.8068	37N	1176
6.51049	37.8036	37N	1176
6.5077	37.8082	37N	1176
6.50919	37.8076	37N	1176
6.50705	37.8096	37N	1176.5
6.50602	37.811	37N	1178.9
6.5049	37.8122	37N	1178.3
6.50416	37.8131	37N	1178.2
6.50462	37.8151	37N	1180.5
6.50583	37.815	37N	1180
6.50639	37.8188	37N	1179.2
6.50807	37.8235	37N	1180.8
6.50788	37.822	37N	1181.3
6.50928	37.822	37N	1180.6
6.51003	37.8209	37N	1181.9
6.50891	37.8196	37N	1181.2
6.50723	37.8201	37N	1180.7
6.51115	37.8197	37N	1182.1
6.51152	37.8186	37N	1180.8
6.51068	37.8169	37N	1181.1
6.51087	37.8142	37N	1191.2
6.51264	37.8137	37N	1186.1
6.51404	37.8134	37N	1189.5
6.5146	37.8115	37N	1185.1
6.51366	37.8087	37N	1183.6
6.51348	37.8072	37N	1179.7
6.51581	37.8076	37N	1180.4
6.5173	37.8075	37N	1182.5
6.51851	37.807	37N	1181.8
6.52317	37.8112	37N	1184.8
6.52159	37.812	37N	1183.7
6.52019	37.8124	37N	1181
6.51907	37.8125	37N	1183.5
6.52224	37.8179	37N	1185.1
6.53296	37.8238	37N	1190.8
6.53846	37.8224	37N	1200.9
6.53892	37.8233	37N	1200.3
6.53939	37.8248	37N	1197.9
6.54153	37.8253	37N	1205.4
6.54349	37.8258	37N	1198.6
6.54563	37.8243	37N	1203.4
6.4923	37.7746	37N	1186.6
6.32795	37.6546	37N	2403.1
6.32731	37.6532	37N	2488.2
6.32539	37.6522	37N	2531.5
6.32234	37.6516	37N	2478.3
6.32154	37.6503	37N	2527.9
6.3209	37.6492	37N	2606
6.32106	37.6467	37N	2675.6
6.32186	37.6456	37N	2674.9
6.32378	37.6385	37N	2572.6
6.32715	37.6459	37N	2498.3
6.32875	37.6435	37N	2515.9
6.32939	37.6416	37N	2558.6
6.33083	37.6398	37N	2618.1
6.33115	37.6388	37N	2630
6.32875	37.639	37N	2617.6
6.32971	37.6369	37N	2644.4
6.32891	37.6353	37N	2667.8
6.32651	37.6367	37N	2626.9
6.32587	37.6403	37N	2611.7
6.32715	37.6421	37N	2597.2
6.33676	37.6077	37N	2711.7
6.33788	37.61	37N	2699.4
6.33211	37.6147	37N	2638.6
6.33035	37.6169	37N	2646.4
6.33243	37.6172	37N	2660.5
6.33804	37.6197	37N	2697.6
6.3366	37.6208	37N	2712.1
6.33948	37.6203	37N	2714.8
6.34012	37.619	37N	2714.4
6.34172	37.6184	37N	2727.3
6.34044	37.6171	37N	2705.1
6.33836	37.6079	37N	2719.7
6.33996	37.6255	37N	2787
6.33948	37.6276	37N	2757
6.33772	37.6263	37N	2750
6.33644	37.6253	37N	2754.7
6.31145	37.6317	37N	2295.8
6.31241	37.6298	37N	2301.2
6.31209	37.6342	37N	2206.5
6.31577	37.629	37N	2337.8
6.31658	37.6298	37N	2286.8
6.3169	37.6311	37N	2248.5
6.31914	37.6195	37N	2470.6
6.35966	37.6305	37N	2268.6
6.36415	37.6277	37N	2481.8
6.36158	37.6197	37N	2501.2
6.36254	37.6181	37N	2574.3
6.3627	37.6163	37N	2629.2
6.36174	37.6113	37N	2678.5
6.36222	37.6095	37N	2690.9
6.36158	37.6077	37N	2699.4
6.36415	37.6087	37N	2719
6.38625	37.6253	37N	2507.5
6.38705	37.6271	37N	2569.2
6.38513	37.6293	37N	2573.5
6.38513	37.6316	37N	2596.1
6.38464	37.6384	37N	2484.7
6.3832	37.6359	37N	2543
6.384	37.653	37N	2495.1
6.38288	37.6556	37N	2411
6.38176	37.6569	37N	2373.7
6.37952	37.6588	37N	2326.5
6.37856	37.6604	37N	2251
6.37712	37.6624	37N	2213.4
6.38096	37.6682	37N	2263.4
6.38304	37.6674	37N	2374.2
6.38432	37.6659	37N	2459.7
6.3627	37.6044	37N	2737.9
6.35774	37.6108	37N	2709.7
6.35758	37.6097	37N	2721.6
6.35646	37.6156	37N	2590.9
6.35598	37.6177	37N	2518.8
6.3563	37.6197	37N	2462.5
6.35566	37.5974	37N	2786.5
6.35357	37.6085	37N	2810.5
6.36895	37.6035	37N	2691
6.36703	37.6053	37N	2696.4
6.36623	37.604	37N	2713.3
6.36703	37.6153	37N	2623.4
6.36943	37.6168	37N	2597.9
6.36799	37.6182	37N	2598.9
6.37199	37.6181	37N	2534.2
6.37327	37.6156	37N	2537.3
6.36959	37.6098	37N	2637
6.36863	37.6074	37N	2661.2
6.37007	37.6053	37N	2653.2
6.37263	37.6026	37N	2635.8
6.37263	37.6081	37N	2603.5
6.32843	37.6298	37N	2638.7
6.33147	37.6285	37N	2665.2
6.33259	37.6471	37N	2386.7
6.33307	37.6424	37N	2578.5
6.33451	37.6417	37N	2578.6
6.33836	37.6574	37N	2123.8
6.37488	37.6907	37N	1921.2
6.37391	37.6883	37N	1958.2
6.37199	37.6869	37N	1976.7
6.3744	37.6841	37N	2033.8
6.37584	37.6819	37N	2129.4
6.37696	37.6799	37N	2229.5
6.37936	37.6791	37N	2306.6
6.37984	37.6775	37N	2392.5
6.37776	37.6775	37N	2362.8
6.38737	37.6703	37N	2387.9
6.38737	37.6674	37N	2475.8
6.38817	37.6648	37N	2534.5
6.38384	37.6624	37N	2330.5
6.38737	37.6611	37N	2463.7
6.38753	37.6588	37N	2536.3
6.38673	37.6575	37N	2559.4
6.38737	37.6553	37N	2611.2
6.38977	37.6532	37N	2639.6
6.39089	37.6517	37N	2689.5
6.39105	37.6561	37N	2612.2
6.38929	37.6574	37N	2562.6
6.39586	37.7014	37N	1895.6
6.39457	37.6996	37N	1899
6.39441	37.6983	37N	1933.3
6.39249	37.6969	37N	1896
6.39265	37.6944	37N	2007.6
6.39009	37.6928	37N	2075.3
6.38897	37.6909	37N	2073.4
6.38593	37.687	37N	2099.1
6.38513	37.6843	37N	2193.8
6.38224	37.7117	37N	1630
6.38016	37.7099	37N	1685.1
6.37936	37.7126	37N	1618.8
6.37648	37.7096	37N	1700.2
6.37536	37.7086	37N	1720.5
6.3744	37.7068	37N	1716
6.37311	37.7031	37N	1759.1
6.37904	37.6856	37N	2092
6.38096	37.6848	37N	2104.7
6.38272	37.6841	37N	2149.1
6.38224	37.6807	37N	2300.6
6.38368	37.6786	37N	2425.8
6.38977	37.683	37N	2128.4
6.39457	37.6843	37N	2028.4
6.39666	37.6864	37N	1956.4
6.39778	37.6875	37N	1911.1
6.40146	37.6848	37N	1921.3
6.39954	37.6833	37N	1982.4
6.40082	37.6801	37N	2015
6.39986	37.678	37N	2092.7
6.39169	37.6745	37N	2320.3
6.39217	37.673	37N	2330.1
6.39586	37.6588	37N	2611
6.39666	37.6624	37N	2484.9
6.39377	37.6611	37N	2562.8
6.41139	37.6564	37N	2269
6.41427	37.6546	37N	2210.9
6.41683	37.6524	37N	2181.8
6.41459	37.6504	37N	2263.6
6.41331	37.6479	37N	2359
6.41251	37.6492	37N	2312.8
6.39666	37.64	37N	2619.2
6.39698	37.6382	37N	2606.2
6.39538	37.6371	37N	2552.4
6.39169	37.6371	37N	2541.3
6.38448	37.6593	37N	2491.4
6.39265	37.6326	37N	2515.9
6.42628	37.6571	37N	1961.4
6.42468	37.6558	37N	1998.7
6.4234	37.6538	37N	2086.3
6.41748	37.6975	37N	1686.2
6.41539	37.6954	37N	1771.2
6.41283	37.6933	37N	1778.6
6.41107	37.6914	37N	1770.7
6.41155	37.6878	37N	1871.9
6.41267	37.6848	37N	1941.9
6.41635	37.6848	37N	1865.6
6.41748	37.6877	37N	1758.8
6.41908	37.6848	37N	1816.5
6.44358	37.7065	37N	1645.8
6.44278	37.7027	37N	1767.8
6.44246	37.6994	37N	1855.2
6.44134	37.6962	37N	1779.4
6.43989	37.7025	37N	1644.3
6.43861	37.6999	37N	1677.8
6.43781	37.6972	37N	1671.5
6.43685	37.6951	37N	1721.4
6.43669	37.6923	37N	1753
6.43653	37.689	37N	1783.9
6.43477	37.6873	37N	1772.7
6.43413	37.6862	37N	1793.9
6.43333	37.6844	37N	1792.4
6.43445	37.6824	37N	1854.6
6.4431	37.6862	37N	1746.1
6.44038	37.6846	37N	1808
6.43861	37.6828	37N	1893.6
6.4194	37.6438	37N	2268.6
6.41635	37.643	37N	2372.1
6.41956	37.6417	37N	2287.2
6.41764	37.6396	37N	2332.5
6.41603	37.6392	37N	2387.9
6.44534	37.7025	37N	1728.9
6.4455	37.6996	37N	1800.5
6.44662	37.6967	37N	1808.6
6.46439	37.6931	37N	1526
6.46616	37.6967	37N	1515.9
6.46584	37.6719	37N	1831.5
6.46407	37.6691	37N	1876.2
6.46343	37.6709	37N	1804.6
6.45767	37.6727	37N	1734
6.45319	37.6817	37N	1615.7
6.46407	37.6909	37N	1526
6.4652	37.7196	37N	1425.4
6.43525	37.7165	37N	1469.7
6.43333	37.7052	37N	1551.3
6.4021	37.7081	37N	1715
6.39794	37.7048	37N	1793.6
6.40258	37.7255	37N	1388.9
6.39521	37.7225	37N	1466.9
6.38577	37.7152	37N	1538.3
6.45511	37.6401	37N	2231.3
6.45815	37.6411	37N	2298.3
6.45863	37.6442	37N	2323.5
6.45959	37.6469	37N	2297.3
6.45767	37.6488	37N	2201.2
6.46135	37.6509	37N	2267.9
6.46423	37.6522	37N	2356.2
6.46664	37.6543	37N	2340.7
6.46856	37.6575	37N	2240
6.46904	37.6596	37N	2119.4
6.47176	37.6585	37N	2244.6
6.47224	37.6554	37N	2289.4
6.46984	37.655	37N	2321.1
6.46856	37.6516	37N	2331.3
6.45431	37.6429	37N	2129.9
6.45431	37.6451	37N	2114.8
6.45527	37.6492	37N	2047.9
6.45239	37.6501	37N	1980.9
6.45094	37.6551	37N	1844.8
6.45014	37.6575	37N	1796.6
6.44838	37.6612	37N	1736.1
6.45303	37.6388	37N	2124.4
6.45687	37.6338	37N	2104.1
6.45479	37.6369	37N	2147.7
6.46279	37.6569	37N	2115.2
6.46279	37.6541	37N	2243.2
6.46167	37.6678	37N	1871.2
6.45959	37.6641	37N	1910.1
6.45847	37.663	37N	1914.9
6.45959	37.6606	37N	1988.1
6.45206	37.667	37N	1741.2
6.45431	37.6682	37N	1769.1
6.47144	37.6815	37N	1642.7
6.47432	37.6761	37N	1735
6.47352	37.6712	37N	1821.2
6.47512	37.6706	37N	1890.2
6.47336	37.6685	37N	1864.8
6.47512	37.6661	37N	1980.5
6.47608	37.6659	37N	2000.5
6.47769	37.6683	37N	1918.6
6.4748	37.6645	37N	2019.2
6.47352	37.6632	37N	2062.8
6.47288	37.662	37N	2149.3
6.47016	37.6638	37N	2021.1
6.47016	37.6616	37N	2078.1
6.43461	37.664	37N	1823.8
6.44246	37.6701	37N	1711.8
6.42548	37.7109	37N	1564.6
6.43957	37.7057	37N	1580.5
6.44198	37.7043	37N	1658.9
6.43621	37.7204	37N	1442.5
6.42356	37.6891	37N	1688.5
6.42148	37.6795	37N	1806.1
6.40274	37.7028	37N	1805.9
6.40514	37.712	37N	1728.3
6.44662	37.7254	37N	1436.5
6.44918	37.7218	37N	1461.1
6.44934	37.7202	37N	1501.7
6.4471	37.7162	37N	1519
6.4455	37.717	37N	1474.8
6.44902	37.7136	37N	1535.1
6.44918	37.7114	37N	1598.2
6.47817	37.6637	37N	2101.1
6.47656	37.6564	37N	2302.3
6.47961	37.6571	37N	2257.4
6.47817	37.7159	37N	1493.9
6.47336	37.7184	37N	1475.2
6.47096	37.7178	37N	1463.3
6.47384	37.7239	37N	1515.1
6.474	37.7273	37N	1453.3
6.4772	37.6983	37N	1574.7
6.47496	37.6975	37N	1608.4
6.44678	37.6886	37N	1691.7
6.46231	37.6728	37N	1745.6
6.45559	37.6638	37N	1834.3
6.4961	37.6524	37N	2143.7
6.49802	37.6525	37N	2132
6.49882	37.6537	37N	2131
6.5017	37.6674	37N	2090.9
6.50763	37.6683	37N	2032.9
6.50587	37.6666	37N	2078
6.50426	37.7012	37N	1751.6
6.50186	37.7089	37N	1738.8
6.49354	37.7147	37N	1671.9
6.52892	37.6722	37N	1938.1
6.52332	37.625	37N	1936.2
6.51868	37.6359	37N	2099.9
6.52764	37.6334	37N	2154.1
6.52764	37.6359	37N	2104.6
6.52908	37.6308	37N	2250.1
6.53116	37.6317	37N	2246.4
6.53004	37.6371	37N	2113.4
6.53004	37.6346	37N	2154.8
6.52204	37.628	37N	1996.5
6.50683	37.6501	37N	2053.3
6.50875	37.6519	37N	2034.5
6.47961	37.6698	37N	1940
6.48153	37.6724	37N	1878.7
6.48569	37.6733	37N	1878.6
6.48665	37.6753	37N	1888.9
6.48857	37.6754	37N	1886.5
6.49162	37.677	37N	1830.3
6.49274	37.6769	37N	1820.4
6.50955	37.662	37N	2129.9
6.48313	37.6575	37N	2295.8
6.53581	37.6616	37N	1811.7
6.53453	37.6598	37N	1831
6.53453	37.6583	37N	1860.5
6.5507	37.659	37N	1880.7
6.5531	37.6622	37N	1873.5
6.55502	37.6648	37N	1856.4
6.55758	37.6643	37N	1857.9
6.56158	37.6844	37N	1672.3
6.56302	37.6844	37N	1667.8
6.54845	37.6883	37N	1636.9
6.54845	37.6859	37N	1662.7
6.53885	37.6957	37N	1649.8
6.53693	37.6944	37N	1661.8
6.53212	37.6954	37N	1660
6.54301	37.6666	37N	1756.4
6.54525	37.668	37N	1746
6.55774	37.6803	37N	1664.6
6.5555	37.6796	37N	1676.2
6.56959	37.6838	37N	1645.8
6.57199	37.6848	37N	1633.6
6.57295	37.6878	37N	1628.5
6.57359	37.6901	37N	1631
6.57343	37.6977	37N	1622.7
6.56078	37.6785	37N	1670.4
6.55374	37.7007	37N	1595.7
6.55262	37.6989	37N	1606.5
6.55166	37.6978	37N	1609.8
6.54365	37.7015	37N	1587.1
6.54974	37.6994	37N	1597.1
6.50443	37.6988	37N	1777.8
6.52316	37.6799	37N	1804.3
6.53004	37.6769	37N	1836.5
6.53661	37.677	37N	1819.7
6.53389	37.6736	37N	1876.7
6.53116	37.6733	37N	1917.2
6.52556	37.6738	37N	1917.1
6.5206	37.6736	37N	1901
6.51884	37.6727	37N	1930.3
6.51259	37.6716	37N	1965.9
6.51003	37.6683	37N	2032.4
6.50779	37.6764	37N	1923.1
6.50539	37.6756	37N	1914.8
6.49802	37.6709	37N	1979
6.4993	37.6691	37N	2023
6.49658	37.6675	37N	2039.4
6.52396	37.7255	37N	1563.9
6.53869	37.707	37N	1644.2
6.53533	37.7089	37N	1639.6
6.53228	37.7104	37N	1645.9
6.53853	37.7573	37N	1423.7
6.53725	37.7541	37N	1481.3
6.53885	37.7554	37N	1461.7
6.49098	37.7241	37N	1671.3
6.49386	37.7267	37N	1658.3
6.49001	37.7444	37N	1469.2
6.49434	37.7412	37N	1485.3
6.51243	37.7391	37N	1424.4
6.50955	37.6901	37N	1798.8
6.52508	37.6978	37N	1707.3
6.58112	37.6794	37N	1660.3
6.58281	37.6777	37N	1672
6.58078	37.6811	37N	1648.5
6.58393	37.6915	37N	1573
6.57999	37.6783	37N	1677.5
6.58911	37.6918	37N	1572.8
6.58697	37.6917	37N	1564
6.58585	37.6926	37N	1567.2
6.59069	37.6944	37N	1561.9
6.5854	37.6672	37N	1722.4
6.6069	37.6639	37N	1506.2
6.62188	37.6676	37N	1486.9
6.31449	37.7175	37N	1888.3
6.3185	37.7202	37N	1740.7
6.32183	37.7184	37N	1755.4
6.32601	37.718	37N	1712.7
6.33135	37.7212	37N	1556.1
6.33352	37.7187	37N	1620.7
6.33485	37.7162	37N	1669.5
6.34086	37.7135	37N	1961.3
6.34537	37.7132	37N	2017.8
6.3477	37.7163	37N	1747.2
6.35171	37.7182	37N	1650.2
6.34987	37.7147	37N	1819.9
6.35004	37.713	37N	1929
6.35204	37.7143	37N	1816.5
6.35638	37.7071	37N	1903.3
6.36106	37.7059	37N	1840.8
6.36289	37.7059	37N	1841
6.3689	37.7162	37N	1647.1
6.3674	37.719	37N	1582.8
6.36323	37.7202	37N	1478.1
6.35755	37.7175	37N	1696.5
6.35338	37.7157	37N	1786.3
6.3714	37.7123	37N	1653.7
6.36974	37.7049	37N	1804.7
6.37641	37.7158	37N	1579.8
6.34036	37.7039	37N	1847.4
6.37031	37.7271	37N	1344.1
6.37201	37.7257	37N	1356.1
6.3723	37.7242	37N	1364.6
6.37272	37.7234	37N	1367.9
6.37388	37.723	37N	1375.8
6.37129	37.7229	37N	1372.8
6.37143	37.7235	37N	1361.8
6.36985	37.7268	37N	1342.2
6.37112	37.7279	37N	1342.4
6.37096	37.7254	37N	1353.1
6.3704	37.7253	37N	1350.4
6.37132	37.7244	37N	1358.5
6.37092	37.7237	37N	1357.7
6.46799	37.7539	37N	1206.4
6.46745	37.7532	37N	1208.3
6.46301	37.7483	37N	1220.5
6.459	37.7458	37N	1223.2
6.45758	37.745	37N	1224.1
6.45935	37.7434	37N	1230.1
6.45527	37.749	37N	1215.9
6.46159	37.7467	37N	1223.8
6.46679	37.7515	37N	1211.7
6.45565	37.7483	37N	1219.1
6.45685	37.7458	37N	1223
6.4565	37.7443	37N	1227
6.45846	37.7476	37N	1217.9
6.46671	37.7494	37N	1216.7
6.4656	37.7469	37N	1221.8
6.46845	37.7472	37N	1229.1
6.46463	37.7477	37N	1221
6.46294	37.7467	37N	1224.4
6.46382	37.7461	37N	1224.5
6.4565	37.7461	37N	1222.5
6.4548	37.744	37N	1226.6
6.45083	37.7457	37N	1228.4
6.45114	37.7461	37N	1225.7
6.45079	37.7433	37N	1235.2
6.45106	37.7429	37N	1236.7
6.44921	37.7384	37N	1257.5
6.44971	37.7388	37N	1254.6
6.46564	37.7434	37N	1237
6.46583	37.7438	37N	1235.1
6.46953	37.7487	37N	1224.3
6.46872	37.748	37N	1225.9
6.4846	37.7634	37N	1189
6.48321	37.7628	37N	1186.9
6.48221	37.762	37N	1188.9
6.48044	37.7611	37N	1191
6.47959	37.7606	37N	1191.4
6.47732	37.7592	37N	1194.5
6.47639	37.7588	37N	1196.2
6.48519	37.737	37N	1427.1
6.48558	37.7364	37N	1430
6.48424	37.7397	37N	1409.7
6.47755	37.742	37N	1360.7
6.47804	37.7392	37N	1368.7
6.47869	37.7397	37N	1361
6.47713	37.7434	37N	1352.3
6.46156	37.7328	37N	1297.6
6.46156	37.7318	37N	1302.6
6.46397	37.7283	37N	1339.5
6.46347	37.7276	37N	1353.1
6.46386	37.7244	37N	1384.1
6.46451	37.7227	37N	1407.1
6.46401	37.7225	37N	1412.8
6.46451	37.72	37N	1420.3
6.46412	37.7173	37N	1443.8
6.46428	37.7165	37N	1446.7
6.44841	37.7279	37N	1417.2
6.44902	37.7277	37N	1420.6
6.44833	37.7251	37N	1452
6.44757	37.7226	37N	1483.4
6.44757	37.7222	37N	1483.5
6.44833	37.7285	37N	1418.5
6.45766	37.7306	37N	1382.6
6.45751	37.7289	37N	1405.5
6.45762	37.726	37N	1423.2
6.54137	37.7006	37N	1597.5
6.54117	37.7001	37N	1605.1
6.54505	37.6987	37N	1601
6.55121	37.6961	37N	1608.5
6.56011	37.7049	37N	1550.1
6.55964	37.7039	37N	1556.3
6.55957	37.703	37N	1560
6.57593	37.7731	37N	1370.6
6.57444	37.7706	37N	1378.2
6.57352	37.7693	37N	1379.4
6.5581	37.7595	37N	1447.3
6.55765	37.7594	37N	1448.7
6.5572	37.7594	37N	1450.9
6.55394	37.7516	37N	1458.6
6.55316	37.751	37N	1463.3
6.55773	37.7496	37N	1449.6
6.56231	37.7597	37N	1428.8
6.56235	37.7601	37N	1428.4
6.56251	37.7587	37N	1428.5
6.56173	37.7578	37N	1430.8
6.55516	37.7566	37N	1446.8
6.55655	37.7563	37N	1439.7
6.56035	37.7469	37N	1441.7
6.56284	37.7502	37N	1429.1
6.56524	37.7523	37N	1420.5
6.56582	37.7526	37N	1418.3
6.56769	37.7576	37N	1410.6
6.5688	37.7597	37N	1403.2
6.5692	37.7604	37N	1401.7
6.56957	37.7615	37N	1399.2
6.56986	37.762	37N	1397.2
6.58414	37.7579	37N	1374.6
6.58345	37.7566	37N	1377.3
6.58321	37.7558	37N	1379.6
6.58214	37.7532	37N	1388.3
6.58137	37.753	37N	1389.7
6.58088	37.7531	37N	1390.2
6.57827	37.7447	37N	1411.6
6.57798	37.7439	37N	1413.2
6.57708	37.7431	37N	1416.2
6.57729	37.7423	37N	1417.5
6.57855	37.7396	37N	1430.8
6.57884	37.738	37N	1437.2
6.57802	37.7312	37N	1450.8
6.57708	37.7302	37N	1456.6
6.57663	37.7279	37N	1458.7
6.57525	37.7272	37N	1463.6
6.5757	37.7278	37N	1462.9
6.57365	37.7245	37N	1471.9
6.57296	37.7242	37N	1473.6
6.57141	37.7235	37N	1478.4
6.56986	37.7219	37N	1482
6.56769	37.7201	37N	1492.5
6.56606	37.7193	37N	1501
6.56549	37.7193	37N	1502.8
6.56447	37.719	37N	1506.3
6.59345	37.7111	37N	1527.8
6.59275	37.7086	37N	1535.4
6.59258	37.7078	37N	1537.6
6.59337	37.7154	37N	1523.4
6.60159	37.6951	37N	1574
6.60483	37.6953	37N	1566.7
6.60684	37.6956	37N	1562.9
6.61095	37.6964	37N	1560.6
6.61165	37.6791	37N	1521.1
6.61288	37.6776	37N	1513.4
6.61436	37.6767	37N	1505.8
6.61725	37.6734	37N	1490.4
6.61725	37.6716	37N	1488
6.38861	37.7084	37N	1652
6.38935	37.708	37N	1659.9
6.3898	37.7074	37N	1666
6.39044	37.7066	37N	1676.5
6.39108	37.7059	37N	1686.4
6.39123	37.7048	37N	1697.6
6.39123	37.703	37N	1727.4
6.39125	37.7022	37N	1741.7
6.39095	37.7018	37N	1745.9
6.39034	37.7004	37N	1778.3
6.39123	37.6988	37N	1814.8
6.38978	37.6993	37N	1794.7
6.38973	37.6983	37N	1818.3
6.38929	37.6975	37N	1840.1
6.38922	37.6967	37N	1862
6.38894	37.6958	37N	1883.7
6.38815	37.6951	37N	1900.3
6.38784	37.6939	37N	1934.7
6.39304	37.6964	37N	1930.7
6.395	37.7011	37N	1861.8
6.39049	37.6938	37N	2019.4
6.38912	37.6912	37N	2066.6
6.32785	37.6888	37N	1810
6.33008	37.689	37N	1831.3
6.33024	37.6876	37N	1826.9
6.33164	37.6869	37N	1852.8
6.33305	37.6858	37N	1872.4
6.3347	37.6858	37N	1884.3
6.33759	37.6841	37N	1899.6
6.34039	37.6824	37N	1903.3
6.34163	37.681	37N	1902.4
6.34337	37.6793	37N	1901.5
6.34394	37.6792	37N	1904.8
6.34477	37.6776	37N	1908.5
6.34535	37.6768	37N	1907.5
6.34683	37.6767	37N	1912.3
6.34906	37.6759	37N	1915.3
6.35046	37.6748	37N	1919.5
6.35088	37.6737	37N	1924.2
6.35212	37.6734	37N	1925.2
6.35278	37.6722	37N	1930.3
6.35335	37.6707	37N	1932.4
6.35104	37.6722	37N	1930.5
6.35013	37.6705	37N	1933.5
6.34989	37.6688	37N	1941.4
6.35335	37.6689	37N	1938.4
6.35269	37.6637	37N	1959
6.35311	37.6602	37N	1975.4
6.35121	37.6654	37N	1953.1
6.34989	37.6681	37N	1944.9
6.3488	37.702	37N	2067
6.34734	37.7013	37N	2108.5
6.3472	37.7005	37N	2099.8
6.35236	37.6963	37N	2166.8
6.35062	37.6954	37N	2192.8
6.35048	37.7003	37N	2065
6.54136	37.7384	37N	1552.4
6.5405	37.7374	37N	1559
6.54221	37.7282	37N	1549.3
6.54245	37.728	37N	1545.8
6.54002	37.7592	37N	1431.9
6.55037	37.7655	37N	1487.4
6.53819	37.7595	37N	1434.5
6.44208	37.7512	37N	1229.8
6.44155	37.7506	37N	1232.2
6.43899	37.7506	37N	1234.1
6.43702	37.7465	37N	1246
6.4342	37.7405	37N	1268.4
6.4338	37.7411	37N	1266
6.43506	37.7435	37N	1257.3
6.43357	37.7368	37N	1282.8
6.43333	37.7393	37N	1271.7
6.43406	37.7437	37N	1256.2
6.44484	37.7397	37N	1259.9
6.44224	37.7509	37N	1230.8
6.43433	37.7398	37N	1271.6
6.43676	37.7458	37N	1248.9
6.44587	37.7479	37N	1228
6.44507	37.7475	37N	1231.7
6.44421	37.7465	37N	1235.9
6.44334	37.7455	37N	1239.4
6.44161	37.7449	37N	1246
6.44095	37.7447	37N	1246.9
6.43985	37.7428	37N	1253.4
6.43938	37.7424	37N	1254.7
6.43885	37.7419	37N	1257.3
6.43835	37.7415	37N	1260.2
6.43786	37.7409	37N	1264.3
6.43666	37.7389	37N	1271.4
6.43603	37.7381	37N	1275.8
6.435	37.7369	37N	1278.7
6.4338	37.7354	37N	1286.2
6.43357	37.7349	37N	1287.9
6.4335	37.7338	37N	1291.2
6.43343	37.7331	37N	1293.3
6.43067	37.7328	37N	1311.3
6.43051	37.7316	37N	1338.3
6.43742	37.7364	37N	1276.5
6.56356	37.8235	37N	1265.7
6.56413	37.8218	37N	1266.8
6.56356	37.8207	37N	1269.4
6.56338	37.8202	37N	1269.8
6.56781	37.8217	37N	1256.7
6.5645	37.8199	37N	1269.3
6.46372	37.776	37N	1180.8
6.46676	37.7754	37N	1179.6
6.46623	37.7728	37N	1182
6.46703	37.772	37N	1184.5
6.46891	37.7688	37N	1184.9
6.46828	37.7664	37N	1187.4
6.4715	37.7673	37N	1183.8
6.47249	37.7664	37N	1184.3
6.47043	37.7544	37N	1204.4
6.47204	37.7572	37N	1199.4
6.47034	37.7527	37N	1206.7
6.45119	37.7703	37N	1186.5
6.45316	37.7725	37N	1184.1
6.45558	37.7717	37N	1184.7
6.45808	37.771	37N	1186.5
6.45719	37.7688	37N	1187.9
6.4562	37.7669	37N	1190.1
6.45611	37.7657	37N	1192.5
6.45513	37.7635	37N	1195.8
6.45513	37.7622	37N	1197.4
6.4486	37.758	37N	1208.2
6.45164	37.7591	37N	1205.1
6.45173	37.7576	37N	1206.8
6.45244	37.7564	37N	1207.7
6.45334	37.754	37N	1211.8
6.45235	37.752	37N	1213.4
6.45235	37.7493	37N	1217.2
6.45388	37.75	37N	1213.8
6.44591	37.7683	37N	1186.9
6.44519	37.771	37N	1181.8
6.4639	37.769	37N	1188.4
6.47025	37.7641	37N	1187.9
6.46363	37.76	37N	1197
6.46327	37.7555	37N	1204.5
6.46175	37.7533	37N	1208.2
6.46041	37.7518	37N	1212.7
6.46578	37.7645	37N	1191.6
6.46685	37.7679	37N	1188.8
6.46166	37.7728	37N	1184.2
6.44698	37.7655	37N	1191
6.46112	37.7624	37N	1195.4
6.44779	37.7664	37N	1189.8
6.45522	37.7697	37N	1186.4
6.46005	37.7683	37N	1189
6.44931	37.7497	37N	1221.7
6.45799	37.7428	37N	1231.5
6.4486	37.77	37N	1185.5
6.45352	37.7682	37N	1190.2
6.45933	37.766	37N	1193.1
6.45898	37.7588	37N	1199.9
6.44278	37.7694	37N	1186.6
6.43741	37.7679	37N	1190.5
6.44555	37.7454	37N	1234.3
6.44099	37.7385	37N	1261.7
6.44045	37.737	37N	1272.8
6.44063	37.7555	37N	1220.6
6.41853	37.7537	37N	1211.1
6.42354	37.7483	37N	1235
6.42864	37.748	37N	1241.2
6.42398	37.76	37N	1206.8
6.41602	37.7614	37N	1198.3
6.41405	37.7527	37N	1214.6
6.43589	37.7606	37N	1205.6
6.43428	37.7552	37N	1220.7
6.44815	37.7403	37N	1252
6.44672	37.7399	37N	1258.4
6.45047	37.7476	37N	1221.8
6.45039	37.7532	37N	1215.3
6.46121	37.7448	37N	1225.6
6.4622	37.7449	37N	1227.4
6.46614	37.746	37N	1222.6
6.46972	37.7693	37N	1183.9
6.44895	37.7591	37N	1205
6.42551	37.7498	37N	1234.4
6.43642	37.7528	37N	1231
6.429	37.7577	37N	1214.3
6.42935	37.7527	37N	1226.2
6.42801	37.7358	37N	1292.3
6.45289	37.7441	37N	1226.7
6.45468	37.7411	37N	1238.7
6.45397	37.7431	37N	1229.1
6.43329	37.7215	37N	1411.1
6.40546	37.7642	37N	1199.5
6.40868	37.7614	37N	1204.2
6.40653	37.7676	37N	1189.8
6.41423	37.7673	37N	1187.3
6.41781	37.7669	37N	1188.2
6.41208	37.7609	37N	1202.4
6.41602	37.7564	37N	1207.5
6.42506	37.7654	37N	1195.8
6.42103	37.7635	37N	1196
6.42282	37.7671	37N	1189.4
6.42569	37.7676	37N	1187.7
6.40089	37.7716	37N	1184.4
6.4017	37.7704	37N	1190.5
6.40116	37.7651	37N	1200
6.42085	37.7621	37N	1198
6.43168	37.7365	37N	1284.3
6.42837	37.7426	37N	1256.9
6.42998	37.7421	37N	1263.4
6.43589	37.7491	37N	1238.9
6.43974	37.7442	37N	1251.3
6.43696	37.7428	37N	1257.8
6.44877	37.7485	37N	1224.2
6.44815	37.7476	37N	1225.4
6.44815	37.7493	37N	1226.3
6.44349	37.7666	37N	1191.7
6.44439	37.7608	37N	1205.1
6.44654	37.7592	37N	1204.5
6.43866	37.7657	37N	1194.2
6.44081	37.7645	37N	1198.2
6.43428	37.7662	37N	1194.9
6.43016	37.7397	37N	1268.9
6.43016	37.7411	37N	1266.2
6.43097	37.7457	37N	1250.5
6.45701	37.7615	37N	1198.4
6.46345	37.7539	37N	1208.3
6.44233	37.7677	37N	1189.5
6.38836	37.7792	37N	1195.6
6.39051	37.7808	37N	1192.5
6.39239	37.7794	37N	1191
6.39364	37.782	37N	1186
6.39221	37.7828	37N	1186.1
6.38989	37.7836	37N	1187.2
6.39427	37.7797	37N	1188.1
6.39928	37.7718	37N	1186.8
6.40501	37.7699	37N	1187.3
6.41441	37.769	37N	1184.2
6.39051	37.7473	37N	1260.5
6.39239	37.7468	37N	1258.9
6.39463	37.7467	37N	1260.4
6.39373	37.7459	37N	1261.9
6.39364	37.7418	37N	1278.2
6.39561	37.7418	37N	1276.8
6.39579	37.7409	37N	1278.1
6.39597	37.7438	37N	1269.7
6.39579	37.7446	37N	1267.6
6.39642	37.747	37N	1259.6
6.39597	37.7461	37N	1262.7
6.39427	37.7392	37N	1287.4
6.39382	37.7437	37N	1268.8
6.39499	37.7427	37N	1274.4
6.39168	37.7455	37N	1265.6
6.3949	37.7483	37N	1253.9
6.39248	37.7388	37N	1291.9
6.38675	37.7482	37N	1264.2
6.3889	37.7489	37N	1258.2
6.48288	37.7636	37N	1187.1
6.48953	37.7719	37N	1185.4
6.4906	37.7714	37N	1187.2
6.49312	37.7689	37N	1195.4
6.49182	37.7687	37N	1194.3
6.49098	37.7681	37N	1196.1
6.49335	37.7733	37N	1185.1
6.49473	37.7723	37N	1187
6.50062	37.7635	37N	1217.4
6.50008	37.7655	37N	1208.2
6.50108	37.7657	37N	1210.4
6.49893	37.7672	37N	1202.3
6.49718	37.7677	37N	1199.2
6.49687	37.769	37N	1195.2
6.49496	37.7682	37N	1197.2
6.49718	37.7651	37N	1206.7
6.49848	37.7638	37N	1211
6.49962	37.7625	37N	1219.2
6.49756	37.7614	37N	1216.1
6.49465	37.7592	37N	1217.5
6.49259	37.7585	37N	1211
6.48961	37.7575	37N	1214.3
6.48601	37.7548	37N	1224.6
6.48356	37.7529	37N	1235.4
6.48104	37.752	37N	1235
6.48096	37.7533	37N	1222.5
6.48127	37.7555	37N	1213.5
6.48058	37.7571	37N	1205.1
6.4828	37.7568	37N	1212.9
6.48792	37.7578	37N	1209.8
6.49358	37.762	37N	1209.8
6.49435	37.7641	37N	1208.9
6.49396	37.7672	37N	1198.9
6.49679	37.7666	37N	1202.2
6.49848	37.7658	37N	1204.6
6.51415	37.7786	37N	1199
6.51599	37.7752	37N	1218.3
6.51002	37.773	37N	1211.1
6.51079	37.7687	37N	1230.4
6.50933	37.7697	37N	1218.7
6.50834	37.7712	37N	1213.5
6.50842	37.7663	37N	1229.2
6.50605	37.7645	37N	1228.6
6.50459	37.7637	37N	1223
6.50345	37.7634	37N	1222.7
6.50261	37.7662	37N	1209.3
6.50406	37.7662	37N	1212.8
6.50528	37.7654	37N	1221.1
6.50543	37.7689	37N	1213.3
6.50788	37.7682	37N	1220.4
6.50643	37.77	37N	1212.7
6.50459	37.7713	37N	1204.6
6.50306	37.7724	37N	1197.2
6.50261	37.7713	37N	1196.9
6.50375	37.7694	37N	1206.2
6.50261	37.7674	37N	1207.4
6.51301	37.7719	37N	1224.9
6.51392	37.7712	37N	1231.2
6.51163	37.7714	37N	1218.3
6.52218	37.7862	37N	1207.6
6.52639	37.7892	37N	1206
6.51782	37.7806	37N	1204.7
6.51775	37.7772	37N	1214
6.52241	37.7642	37N	1331.2
6.5221	37.7621	37N	1353
6.5205	37.7625	37N	1351.7
6.52593	37.762	37N	1340.6
6.52677	37.7604	37N	1361.6
6.52577	37.7578	37N	1385.5
6.52394	37.7596	37N	1343.4
6.52119	37.7584	37N	1315.5
6.52264	37.7568	37N	1360.4
6.52662	37.7558	37N	1435.9
6.52662	37.7674	37N	1361.2
6.52753	37.7762	37N	1287.9
6.52616	37.7781	37N	1280.3
6.52447	37.7799	37N	1279.9
6.52432	37.7869	37N	1209.4
6.52868	37.7944	37N	1192.8
6.52753	37.7922	37N	1193.6
6.52447	37.7945	37N	1181.8
6.52967	37.8018	37N	1188.9
6.52899	37.8003	37N	1188.9
6.52822	37.7987	37N	1187.9
6.52723	37.7971	37N	1186.5
6.53197	37.8013	37N	1196.4
6.50115	37.7675	37N	1203.6
6.49855	37.7697	37N	1196.1
6.49871	37.7741	37N	1184.2
6.49695	37.7731	37N	1186.6
6.51132	37.7803	37N	1195.5
6.50987	37.7776	37N	1200.6
6.50888	37.779	37N	1196.1
6.51171	37.7864	37N	1185.4
6.50666	37.7793	37N	1189
6.49351	37.7665	37N	1200.9
6.488	37.7709	37N	1186.1
6.48984	37.7684	37N	1194.7
6.48808	37.7665	37N	1194.5
6.48823	37.7645	37N	1197
6.48433	37.7623	37N	1192.5
6.4776	37.7696	37N	1181.8
6.47943	37.7656	37N	1182.4
6.48372	37.7678	37N	1182.8
6.47538	37.7668	37N	1185.7
6.47882	37.7625	37N	1186.5
6.49052	37.7633	37N	1201
6.47011	37.7618	37N	1193.4
6.47829	37.7593	37N	1194.5
6.47286	37.7581	37N	1194.8
6.47156	37.7636	37N	1188.7
6.46957	37.7558	37N	1201.3
6.46666	37.7612	37N	1194.5
6.47156	37.7508	37N	1216.7
6.51928	37.784	37N	1204.8
6.52172	37.7912	37N	1190.1
6.52409	37.7895	37N	1199.1
6.52807	37.7938	37N	1191.3
6.51492	37.7863	37N	1195.1
6.51553	37.7849	37N	1197.8
6.53197	37.8049	37N	1195.7
6.53457	37.8087	37N	1195.5
6.53052	37.8049	37N	1191.1
6.52845	37.8046	37N	1185.6
6.52631	37.8046	37N	1184.3
6.52463	37.8056	37N	1186.1
6.52738	37.8083	37N	1185.4
6.52799	37.802	37N	1186.2
6.52616	37.8029	37N	1184.5
6.61842	37.6968	37N	1556.9
6.62124	37.6971	37N	1560
6.62435	37.6966	37N	1566.2
6.62623	37.6959	37N	1568.9
6.61277	37.6993	37N	1556.1
6.61785	37.7012	37N	1548.4
6.61757	37.6826	37N	1523.6
6.60533	37.6761	37N	1548
6.59789	37.6716	37N	1585.6
6.60533	37.7046	37N	1543.7
6.6186	37.6992	37N	1557.6
6.62011	37.6976	37N	1556.9
6.63028	37.6944	37N	1574.5
6.61465	37.6694	37N	1496.2
6.61314	37.6706	37N	1502.5
6.6123	37.672	37N	1507.7
6.61248	37.6737	37N	1509.5
6.61343	37.6759	37N	1510.5
6.61399	37.6824	37N	1530.6
6.62971	37.6932	37N	1569.3
6.61879	37.7048	37N	1541.2
6.61521	37.6987	37N	1556.1
6.60373	37.7144	37N	1517.3
6.60382	37.7101	37N	1533.8
6.6057	37.7079	37N	1538
6.61992	37.684	37N	1539.2
6.61992	37.6822	37N	1533.5
6.61399	37.6789	37N	1517.7
6.61455	37.6727	37N	1503.4
6.62501	37.6773	37N	1514.4
6.60674	37.6771	37N	1537.5
6.60843	37.6733	37N	1521.1
6.60947	37.6719	37N	1510.6
6.60787	37.6809	37N	1539.2
6.60665	37.7246	37N	1487.1
6.60514	37.722	37N	1495.8
6.60778	37.7151	37N	1516
6.61041	37.713	37N	1520
6.60231	37.7267	37N	1479.3
6.60533	37.7149	37N	1518.5
6.60919	37.7104	37N	1528.9
6.6218	37.6714	37N	1499.5
6.60297	37.6791	37N	1559.2
6.60589	37.6788	37N	1543.5
6.60382	37.6711	37N	1540.1
6.60269	37.6898	37N	1573.4
6.60721	37.7198	37N	1498.1
6.60636	37.7185	37N	1505.8
6.60674	37.7281	37N	1476.4
6.60533	37.7311	37N	1479.4
6.60316	37.7178	37N	1506.6
6.42473	37.7456	37N	1245.1
6.42413	37.7378	37N	1283.3
6.4189	37.7499	37N	1228.7
6.41747	37.7363	37N	1296.7
6.41307	37.7352	37N	1297.5
6.41723	37.7429	37N	1256
6.407	37.7333	37N	1305
6.37867	37.738	37N	1301.2
6.37605	37.7768	37N	1303.6
6.38819	37.7732	37N	1227.7
6.38783	37.7678	37N	1246.5
6.38855	37.7525	37N	1245.5
6.37676	37.7584	37N	1242.4
6.38867	37.7382	37N	1298.1
6.38402	37.7389	37N	1299.8
6.39081	37.7587	37N	1233
6.35117	37.738	37N	1331.5
6.35319	37.763	37N	1307.8
6.35319	37.7594	37N	1302.2
6.34188	37.7509	37N	1315.6
6.3451	37.7491	37N	1322.4
6.3426	37.7473	37N	1329.8
6.34641	37.7358	37N	1357.9
6.35486	37.7515	37N	1294.9
6.362	37.758	37N	1280.2
6.33117	37.7369	37N	1378.2
6.3345	37.7377	37N	1369.6
6.33367	37.7353	37N	1386.7
6.32974	37.732	37N	1414
6.33188	37.7326	37N	1409.2
6.32724	37.7418	37N	1360.7
6.33494	37.7639	37N	1307
6.33539	37.762	37N	1305.5
6.33482	37.762	37N	1304.3
6.33546	37.7641	37N	1306.6
6.33482	37.7652	37N	1306.3
6.34047	37.7257	37N	1457.4
6.33989	37.7253	37N	1453.3
6.34098	37.724	37N	1475.7
6.32074	37.7658	37N	1293.1
6.32145	37.7655	37N	1292.9
6.32364	37.7653	37N	1294.6
6.32241	37.7655	37N	1293
6.32479	37.7677	37N	1292.1
6.32306	37.7648	37N	1294.3
6.32402	37.7643	37N	1296.4
6.40493	37.7517	37N	1232.3
6.40686	37.7527	37N	1225.4
6.41011	37.7567	37N	1211.4
6.40886	37.7564	37N	1212.8
6.40986	37.7586	37N	1205.9
6.40268	37.7473	37N	1247.4
6.40206	37.7434	37N	1259.7
6.40324	37.7491	37N	1242.9
6.40224	37.7484	37N	1245.4
6.4023	37.7459	37N	1251.5
6.41211	37.73	37N	1349
6.39182	37.7518	37N	1248.6
6.39119	37.751	37N	1248.6
6.3955	37.773	37N	1230
6.3631	37.7454	37N	1273.5
6.36397	37.7464	37N	1268.1
6.36079	37.7442	37N	1283.9
6.37115	37.743	37N	1276.4
6.37196	37.7401	37N	1286.5
6.3699	37.7361	37N	1300.9
6.36984	37.7336	37N	1312
6.35361	37.7439	37N	1310.7
6.3478	37.7502	37N	1314.5
6.3561	37.7429	37N	1302.1
6.36141	37.7451	37N	1279.8
6.37402	37.7579	37N	1242.3
6.37646	37.7386	37N	1296
6.56535	37.7323	37N	1484.4
6.5673	37.7352	37N	1464.6
6.55775	37.7257	37N	1528
6.55728	37.7207	37N	1538.7
6.54485	37.7168	37N	1584.2
6.54383	37.7265	37N	1542.2
6.5596	37.7188	37N	1545.4
6.56294	37.7188	37N	1518
6.56962	37.7282	37N	1493.4
6.57861	37.7046	37N	1591.9
6.55914	37.7006	37N	1562.5
6.56229	37.6979	37N	1579.8
6.55274	37.716	37N	1567.8
6.5417	37.7229	37N	1595.7
6.54523	37.72	37N	1590.1
6.53493	37.7423	37N	1575.8
6.53966	37.7405	37N	1562.1
6.54198	37.74	37N	1547.6
6.54374	37.7385	37N	1535.6
6.54142	37.737	37N	1555.4
6.53122	37.7328	37N	1597.4
6.53651	37.7295	37N	1576.8
6.53883	37.7314	37N	1566.3
6.54216	37.7335	37N	1553
6.55079	37.7572	37N	1463.9
6.55292	37.7598	37N	1471
6.55747	37.7629	37N	1453.7
6.55339	37.764	37N	1479.8
6.55144	37.7615	37N	1486.4
6.52779	37.7526	37N	1448.8
6.52399	37.7537	37N	1385.9
6.53233	37.7139	37N	1650.1
6.55812	37.7146	37N	1555.9
6.55552	37.7102	37N	1562.8
6.55515	37.722	37N	1537.6
6.54383	37.7189	37N	1598.3
6.32523	37.6906	37N	1752.6
6.3249	37.6933	37N	1725.1
6.32319	37.6942	37N	1708.5
6.32099	37.6954	37N	1690.9
6.31904	37.6965	37N	1682.9
6.31725	37.6973	37N	1677.4
6.32433	37.6891	37N	1783.8
6.32384	37.6881	37N	1801.6
6.32376	37.6868	37N	1793.1
6.32335	37.684	37N	1818.2
6.3223	37.6825	37N	1817
6.3205	37.6782	37N	1951.1
6.31888	37.676	37N	1979.7
6.32213	37.6732	37N	1998.9
6.33207	37.6768	37N	2008.3
6.33362	37.677	37N	1965
6.33345	37.6793	37N	1940
6.31122	37.695	37N	1697.9
6.31407	37.695	37N	1703.8
6.3126	37.6889	37N	1741.4
6.31236	37.6832	37N	1784.6
6.31456	37.6833	37N	1788.6
6.32107	37.6824	37N	1846.7
6.32067	37.6841	37N	1853.6
6.3157	37.693	37N	1706.6
6.31741	37.6937	37N	1698.8
6.31977	37.6937	37N	1697.7
6.32783	37.6936	37N	1763.9
6.32987	37.6945	37N	1778.4
6.32938	37.6971	37N	1779.5
6.3262	37.699	37N	1765.1
6.33044	37.7029	37N	1853.4
6.3271	37.7067	37N	1848.3
6.3236	37.7124	37N	1825.8
6.31089	37.7153	37N	1861.9
6.30837	37.7111	37N	1799
6.31374	37.7033	37N	1718.3
6.3179	37.7022	37N	1728.5
6.33451	37.6988	37N	1833.6
6.31415	37.7092	37N	1789.7
6.32425	37.7049	37N	1789.4
6.33459	37.7065	37N	1791.6
6.31798	37.7135	37N	1866.3
6.33476	37.7574	37N	1309.9
6.33555	37.7584	37N	1304.2
6.33389	37.7589	37N	1299
6.33452	37.7569	37N	1308.1
6.3409	37.7498	37N	1321.1
6.34594	37.7527	37N	1309.4
6.34909	37.7517	37N	1307.9
6.35003	37.7492	37N	1308.8
6.34649	37.7456	37N	1326.2
6.34129	37.7417	37N	1351.2
6.32445	37.7485	37N	1331.8
6.32122	37.7479	37N	1366
6.32122	37.7489	37N	1404.3
6.31949	37.7472	37N	1387.8
6.3346	37.7474	37N	1329.3
6.33925	37.751	37N	1317.9
6.34799	37.7605	37N	1309.3
6.35216	37.7397	37N	1323
6.3494	37.7386	37N	1336.9
6.34476	37.7373	37N	1357.7
6.34515	37.7354	37N	1362.6
6.34129	37.7534	37N	1309.7
6.34633	37.7513	37N	1311
6.33657	37.7427	37N	1348.8
6.3716	37.7515	37N	1253.6
6.38247	37.7611	37N	1237.1
6.38931	37.7608	37N	1242.5
6.39034	37.759	37N	1236.3
6.38632	37.7446	37N	1276.6
6.38034	37.739	37N	1298
6.36279	37.7557	37N	1268.7
6.36798	37.7531	37N	1251.1
6.36956	37.7513	37N	1252
6.37113	37.7498	37N	1254.7
6.38034	37.7487	37N	1260.7
6.38286	37.7485	37N	1263.4
6.38782	37.7485	37N	1261.5
6.38979	37.7482	37N	1257.3
