# Supplementary material for: Spatiotemporal dynamics of land use land cover change and its drivers in the western part of Lake Abaya, Ethiopia
Source: PeerJ. 2024 Sep 18;12:e17892. doi: 10.7717/peerj.17892 (PMC11416075; doi:10.7717/peerj.17892)
Supplement: Supplemental Information 5 [file peerj-12-17892-s005.xlsx]

## Sheet: Sheet1
Latitude	Longitude	utm_zone	Altitude (m)
6.53451	37.7769	37N	1379.2
6.53255	37.7764	37N	1346.8
6.52709	37.7725	37N	1315.5
6.53656	37.7509	37N	1467.7
6.53571	37.7516	37N	1460.5
6.534	37.7526	37N	1431
6.5323	37.7592	37N	1361.5
6.53136	37.7602	37N	1353
6.53008	37.7611	37N	1342.1
6.52846	37.7621	37N	1326.5
6.52547	37.7637	37N	1303.2
6.52471	37.7516	37N	1380.3
6.52257	37.7531	37N	1359.1
6.52582	37.7495	37N	1407.7
6.52658	37.7465	37N	1446.1
6.52701	37.7445	37N	1470.3
6.52726	37.7416	37N	1492.7
6.53315	37.7577	37N	1379.2
6.49486	37.7468	37N	1338.7
6.49529	37.7457	37N	1354.8
6.49546	37.7446	37N	1365.8
6.49503	37.7437	37N	1374
6.50143	37.7409	37N	1379.9
6.50151	37.739	37N	1393.8
6.50151	37.7389	37N	1395.3
6.50629	37.7388	37N	1383.2
6.50322	37.7365	37N	1408.6
6.50364	37.7354	37N	1430.2
6.501	37.7225	37N	1577
6.49733	37.7156	37N	1644.6
6.4975	37.7136	37N	1658.5
6.47652	37.7404	37N	1350.7
6.4761	37.7388	37N	1363.6
6.47908	37.735	37N	1380.2
6.48028	37.733	37N	1401.3
6.48096	37.7315	37N	1402.6
6.48275	37.7307	37N	1430.4
6.48002	37.7287	37N	1429.2
6.48087	37.728	37N	1449.4
6.48113	37.7263	37N	1486.3
6.4819	37.7253	37N	1510.7
6.47951	37.7278	37N	1444
6.47891	37.7258	37N	1468.9
6.47976	37.724	37N	1518.4
6.47951	37.7437	37N	1318.1
6.47985	37.7425	37N	1325.2
6.48011	37.7408	37N	1333.8
6.48207	37.7392	37N	1374.5
6.48377	37.7362	37N	1413.9
6.48505	37.7347	37N	1426
6.48556	37.7423	37N	1352.8
6.48633	37.7404	37N	1378.1
6.48642	37.738	37N	1397.4
6.48983	37.7327	37N	1488.9
6.48923	37.7306	37N	1526.2
6.48898	37.7295	37N	1541.7
6.48966	37.7277	37N	1584.3
6.49196	37.7296	37N	1568.4
6.45947	37.7269	37N	1407.9
6.45947	37.726	37N	1410.2
6.45879	37.7253	37N	1415.7
6.45896	37.7245	37N	1419.4
6.45819	37.724	37N	1420.8
6.45742	37.7228	37N	1422.1
6.45614	37.7216	37N	1429.9
6.4535	37.72	37N	1449.9
6.45486	37.7334	37N	1326.3
6.45435	37.7317	37N	1341.8
6.45409	37.7303	37N	1353.2
6.45273	37.7285	37N	1379.9
6.45162	37.7283	37N	1401
6.46484	37.697	37N	1522.2
6.46458	37.7065	37N	1486.6
6.4651	37.7085	37N	1476.1
6.46092	37.7029	37N	1525.8
6.46186	37.7001	37N	1528.8
6.46467	37.6929	37N	1525.4
6.46603	37.6952	37N	1519.4
6.46382	37.6968	37N	1538.3
6.46544	37.7136	37N	1462.2
6.46458	37.715	37N	1454.6
6.4639	37.7172	37N	1449.4
6.46987	37.7184	37N	1460.4
6.47226	37.7174	37N	1469.5
6.47712	37.7165	37N	1492.5
6.48096	37.7149	37N	1508.5
6.48795	37.7131	37N	1551.5
6.50356	37.7158	37N	1602.2
6.50322	37.7125	37N	1643.9
6.5062	37.7189	37N	1558
6.50663	37.738	37N	1412.2
6.50765	37.7362	37N	1466.7
6.50313	37.6919	37N	1726.7
6.47635	37.6674	37N	1930.3
6.48548	37.6735	37N	1873
6.4923	37.6769	37N	1817.3
6.49452	37.6786	37N	1774.6
6.50347	37.6668	37N	2096.6
6.5085	37.6672	37N	2062.8
6.4703	37.6694	37N	1849.7
6.47311	37.6691	37N	1858.2
6.47345	37.6731	37N	1778.9
6.47414	37.6673	37N	1896.4
6.47456	37.6634	37N	2043.5
6.47439	37.6617	37N	2129.2
6.47414	37.6748	37N	1752.4
6.47593	37.6763	37N	1737.4
6.44309	37.7147	37N	1459.1
6.44164	37.7124	37N	1485.8
6.43994	37.7108	37N	1513.1
6.43866	37.7091	37N	1531.8
6.43789	37.7068	37N	1556.9
6.43883	37.6839	37N	1857
6.44096	37.6858	37N	1763.4
6.4303	37.687	37N	1699.9
6.42885	37.6844	37N	1732.2
6.42791	37.6817	37N	1763.6
6.42689	37.6995	37N	1605.3
6.42765	37.7008	37N	1589.5
6.39123	37.6508	37N	2684.1
6.39132	37.6514	37N	2680.8
6.3914	37.6559	37N	2618.6
6.3903	37.652	37N	2673.7
6.39644	37.6584	37N	2593.1
6.39192	37.6676	37N	2462.2
6.40991	37.6568	37N	2291.4
6.40821	37.6561	37N	2333.5
6.3961	37.6362	37N	2537.3
6.39499	37.6367	37N	2536.1
6.40778	37.6431	37N	2455.6
6.40684	37.6436	37N	2457.6
6.41077	37.6492	37N	2343.3
6.40974	37.6485	37N	2369.9
6.40573	37.7016	37N	1704.7
6.40422	37.7358	37N	1288.8
6.404	37.7355	37N	1292.8
6.40386	37.735	37N	1297
6.40352	37.7344	37N	1300.1
6.40321	37.734	37N	1302.6
6.40307	37.7335	37N	1306.4
6.40426	37.7373	37N	1280.9
6.40473	37.7375	37N	1279.3
6.40503	37.7385	37N	1273.8
6.59639	37.7385	37N	1435.3
6.59861	37.7336	37N	1440.8
6.59912	37.7311	37N	1442.5
6.59869	37.729	37N	1453.5
6.59631	37.724	37N	1470.9
6.59562	37.7258	37N	1466.4
6.59767	37.7226	37N	1468.9
6.59707	37.7208	37N	1481.1
6.59758	37.7194	37N	1480.5
6.59758	37.7179	37N	1488.7
6.59946	37.7158	37N	1494.2
6.60057	37.7145	37N	1499.6
6.60082	37.7119	37N	1507.7
6.60108	37.7102	37N	1514.3
6.60048	37.7097	37N	1513.3
6.5992	37.7084	37N	1520.7
6.60151	37.7067	37N	1535.5
6.59886	37.7063	37N	1526.6
6.60031	37.7061	37N	1536
6.59443	37.7432	37N	1417.6
6.59417	37.7446	37N	1415
6.60517	37.6637	37N	1512.7
6.60603	37.662	37N	1497.8
6.60688	37.6602	37N	1485.3
6.60799	37.6581	37N	1473.4
6.60176	37.6575	37N	1517.8
6.6004	37.6558	37N	1535.1
6.59426	37.6643	37N	1632.8
6.62572	37.6727	37N	1487.2
6.62512	37.6713	37N	1484
6.62512	37.6688	37N	1471.9
6.62427	37.6665	37N	1472.3
6.62444	37.6653	37N	1465
6.61259	37.665	37N	1479.1
6.61336	37.663	37N	1470.9
6.61344	37.6616	37N	1465.5
6.61413	37.6601	37N	1458.7
6.61532	37.6599	37N	1455.3
6.61557	37.6569	37N	1436.6
6.60219	37.649	37N	1471.1
6.60662	37.6512	37N	1452.1
6.60807	37.6532	37N	1446.3
6.61131	37.6562	37N	1453.7
6.57352	37.8125	37N	1314.1
6.57335	37.81	37N	1322
6.57139	37.8087	37N	1323.5
6.56981	37.8081	37N	1330.9
6.56478	37.807	37N	1353.4
6.56891	37.7981	37N	1371.6
6.57019	37.7988	37N	1365.2
6.57049	37.7966	37N	1362.4
6.5716	37.795	37N	1352.1
6.57254	37.7943	37N	1357.2
6.57241	37.7933	37N	1359.1
6.57045	37.7927	37N	1367.4
6.57476	37.7895	37N	1355.9
6.57075	37.7871	37N	1382.6
6.57071	37.791	37N	1373.1
6.5612	37.806	37N	1371.8
6.55983	37.8074	37N	1362.5
6.55958	37.8053	37N	1364.6
6.55838	37.8031	37N	1334.9
6.55553	37.8015	37N	1362.3
6.55702	37.7947	37N	1393
6.5667	37.7819	37N	1395.1
6.56614	37.7813	37N	1396.4
6.57041	37.8061	37N	1341.9
6.57011	37.8033	37N	1350.6
6.56968	37.8026	37N	1360
6.57472	37.7802	37N	1363.6
6.57873	37.7536	37N	1403
6.57728	37.7505	37N	1403.4
6.57557	37.7482	37N	1408.8
6.58	37.7629	37N	1408.5
6.56594	37.7561	37N	1420.5
6.57685	37.7765	37N	1370.2
6.57992	37.7768	37N	1375.1
6.57063	37.749	37N	1435.3
6.56901	37.7479	37N	1441.4
6.56926	37.7686	37N	1409.3
6.58111	37.7668	37N	1391.9
6.57941	37.7656	37N	1404.4
6.52987	37.694	37N	1676.5
6.52952	37.6943	37N	1679
6.52825	37.694	37N	1686.7
6.53822	37.6639	37N	1775.8
6.53447	37.6618	37N	1791.9
6.52535	37.6548	37N	1877.5
6.51085	37.6686	37N	2032.8
6.52611	37.652	37N	1909.3
6.49279	37.6544	37N	2188.4
6.49211	37.6526	37N	2161.9
6.48887	37.6567	37N	2250.6
6.49616	37.6656	37N	2106.9
6.49501	37.6719	37N	1948.1
6.49437	37.6757	37N	1868.3
6.49386	37.6763	37N	1849.8
6.49194	37.6752	37N	1877.1
6.49121	37.6703	37N	2014.2
6.49057	37.6695	37N	2038.4
6.48678	37.6823	37N	1661.5
6.49428	37.6806	37N	1708.1
6.49697	37.6801	37N	1775.5
6.49846	37.661	37N	2206
6.49718	37.6571	37N	2174.3
6.48226	37.6634	37N	2138.5
6.4832	37.6574	37N	2296.4
6.48443	37.6571	37N	2290.8
6.48081	37.6735	37N	1826.9
6.48115	37.6713	37N	1916.8
6.48469	37.6756	37N	1785.7
6.46776	37.6843	37N	1578.9
6.46883	37.684	37N	1589
6.46896	37.6834	37N	1599.5
6.46942	37.6824	37N	1616
6.47143	37.6823	37N	1632
6.47194	37.6768	37N	1721.2
6.47156	37.6754	37N	1742.4
6.46857	37.6604	37N	2078.7
6.46827	37.6583	37N	2179.3
6.47821	37.6778	37N	1728.4
6.47787	37.6839	37N	1671.2
6.46311	37.6769	37N	1659.9
6.46154	37.6747	37N	1697
6.45906	37.6695	37N	1794
6.45949	37.6679	37N	1828.9
6.46171	37.6649	37N	1930.5
6.46256	37.6721	37N	1767.7
6.46328	37.6712	37N	1794.6
6.46371	37.6701	37N	1838.7
6.46746	37.6699	37N	1839.4
6.46618	37.668	37N	1898.2
6.46836	37.672	37N	1794.7
6.46917	37.6735	37N	1767.1
6.46972	37.6747	37N	1744
6.46964	37.6795	37N	1661.1
6.46968	37.6805	37N	1645.8
6.47194	37.6775	37N	1704.2
6.4713	37.6815	37N	1643.5
6.47028	37.661	37N	2104.7
6.44657	37.6887	37N	1690
6.44635	37.6901	37N	1698.8
6.44589	37.6816	37N	1759.3
6.44508	37.6747	37N	1714.4
6.44341	37.6745	37N	1739.9
6.32269	37.7528	37N	1321.8
6.31519	37.7373	37N	1444
6.31553	37.7239	37N	1699.4
6.3203	37.7291	37N	1559
6.32406	37.7195	37N	1666.4
6.33225	37.7201	37N	1600.5
6.34351	37.715	37N	1909.8
6.3517	37.7215	37N	1539.8
6.35818	37.7177	37N	1671.8
6.36637	37.7198	37N	1540.9
6.37217	37.7129	37N	1633.5
6.37695	37.7112	37N	1629.7
6.38377	37.7174	37N	1523.3
6.37319	37.705	37N	1721.9
6.52658	37.8064	37N	1187.8
6.52948	37.8062	37N	1189.5
6.53272	37.8061	37N	1195.3
6.52479	37.8106	37N	1187.3
6.52471	37.8106	37N	1187.2
6.52275	37.811	37N	1185.9
6.52505	37.8049	37N	1185.8
6.52863	37.8038	37N	1187.1
6.53409	37.8103	37N	1197.4
6.53716	37.8124	37N	1203.3
6.52633	37.79	37N	1202.7
6.52701	37.7932	37N	1188.9
6.5236	37.7866	37N	1209.5
6.52181	37.7844	37N	1211
6.51831	37.7896	37N	1190.5
6.51831	37.7918	37N	1188
6.39878	37.7625	37N	1210.1
6.39784	37.7608	37N	1214.3
6.39776	37.7532	37N	1236.6
6.39639	37.7533	37N	1236.2
6.39955	37.7493	37N	1245.8
6.40791	37.7602	37N	1207.9
6.40595	37.7578	37N	1215.3
6.40399	37.7557	37N	1224.2
6.40663	37.7492	37N	1235.1
6.41047	37.7503	37N	1224.9
6.41072	37.7543	37N	1213.3
6.41763	37.7592	37N	1203.6
6.41994	37.756	37N	1212.6
6.4132	37.7473	37N	1233.9
6.42087	37.753	37N	1221
6.41678	37.7531	37N	1212.6
6.41533	37.7591	37N	1198.4
6.41107	37.7572	37N	1208.1
6.4184	37.7619	37N	1197.6
6.4039	37.764	37N	1202.4
6.42446	37.7421	37N	1261.7
6.42386	37.7443	37N	1252.1
6.40561	37.7449	37N	1248
6.40262	37.7434	37N	1258.9
6.39784	37.7378	37N	1283.6
6.40637	37.7403	37N	1268.1
6.40272	37.739	37N	1278.3
6.40261	37.7379	37N	1282.7
6.40248	37.7363	37N	1291.9
6.40259	37.7355	37N	1296.3
6.4024	37.7347	37N	1300.6
6.40257	37.7339	37N	1305.4
6.40466	37.7335	37N	1302.6
6.404	37.7337	37N	1304.4
6.40491	37.7344	37N	1295.6
6.40438	37.7348	37N	1296.4
6.40502	37.7353	37N	1289.7
6.40444	37.7354	37N	1291.3
6.40223	37.7304	37N	1326.4
6.40214	37.7308	37N	1325
6.4031	37.7329	37N	1310.4
6.40393	37.7325	37N	1311.7
6.40443	37.7322	37N	1311.2
6.40363	37.7338	37N	1303.7
6.40385	37.7346	37N	1299.2
6.40352	37.7315	37N	1319.5
6.4034	37.731	37N	1322.7
6.40313	37.7305	37N	1325.3
6.40369	37.741	37N	1265.6
6.40404	37.7413	37N	1264.4
6.40373	37.7389	37N	1277.1
6.40408	37.7385	37N	1277.6
6.4036	37.7371	37N	1285.9
6.40447	37.7419	37N	1261.8
6.40444	37.7417	37N	1262.6
6.40488	37.7422	37N	1259.7
6.58121	37.7315	37N	1458.8
6.58053	37.7297	37N	1469
6.58011	37.7282	37N	1477.9
6.57934	37.7266	37N	1484.8
6.57994	37.7238	37N	1490.1
6.58207	37.7231	37N	1499.3
6.58215	37.7231	37N	1499.5
6.58445	37.722	37N	1506.5
6.58548	37.7234	37N	1500.2
6.5859	37.7253	37N	1493.2
6.5865	37.7272	37N	1482.1
6.59076	37.7224	37N	1494.4
6.59076	37.7198	37N	1505.8
6.58948	37.7168	37N	1518.9
6.58855	37.7148	37N	1532.4
6.58735	37.7134	37N	1542.6
6.58624	37.7122	37N	1547
6.58778	37.7085	37N	1555.9
6.58642	37.7036	37N	1572.4
6.5842	37.703	37N	1585.5
6.58087	37.6971	37N	1603.2
6.59776	37.7119	37N	1522.9
6.5952	37.709	37N	1536.2
6.59554	37.7067	37N	1540.2
6.59409	37.7081	37N	1539.3
6.59494	37.7048	37N	1543.8
6.58863	37.6957	37N	1568.1
6.59997	37.7243	37N	1486.6
6.60117	37.7214	37N	1495.6
6.60176	37.7194	37N	1500.9
6.60483	37.72	37N	1502.4
6.60509	37.7232	37N	1493.2
6.60372	37.7267	37N	1486.6
6.60586	37.7311	37N	1478.2
6.60475	37.7357	37N	1470.3
6.60176	37.7347	37N	1457.8
6.60398	37.7382	37N	1457.5
6.60134	37.7389	37N	1450.3
6.60961	37.7156	37N	1513.5
6.60961	37.7142	37N	1517.8
6.6102	37.7125	37N	1522.6
6.60722	37.6776	37N	1534.6
6.60807	37.6752	37N	1527.2
6.60901	37.673	37N	1516.3
6.6073	37.6723	37N	1524
6.60031	37.6713	37N	1576.8
6.59827	37.6715	37N	1583.6
6.5969	37.6706	37N	1599.2
6.59648	37.6694	37N	1608.4
6.60372	37.657	37N	1487
6.60236	37.6546	37N	1490.3
6.601	37.6677	37N	1553.6
6.60364	37.6662	37N	1529.5
6.60884	37.6633	37N	1494.7
6.60773	37.6611	37N	1491.7
6.6108	37.6597	37N	1474.7
6.61285	37.658	37N	1456.6
6.61549	37.669	37N	1492.9
6.61242	37.674	37N	1510.1
6.61788	37.6815	37N	1522.6
6.61822	37.6786	37N	1518.4
6.60543	37.7068	37N	1541.3
6.60568	37.7053	37N	1541.1
6.60074	37.6987	37N	1561.5
6.60483	37.6975	37N	1564.3
6.60662	37.6933	37N	1567.8
6.60355	37.6895	37N	1570.3
6.60483	37.6839	37N	1552.1
6.6073	37.6828	37N	1546.4
6.56691	37.8211	37N	1258.4
6.56657	37.8221	37N	1257.9
6.56214	37.8221	37N	1262.2
6.56094	37.8212	37N	1258.3
6.55945	37.8203	37N	1255.9
6.56005	37.8188	37N	1258.5
6.56286	37.8196	37N	1266.5
6.57233	37.8207	37N	1299.3
6.57143	37.8187	37N	1308
6.57075	37.8156	37N	1317.5
6.56904	37.8162	37N	1321.6
6.57024	37.8186	37N	1311.3
6.56776	37.8094	37N	1344.6
6.56602	37.8084	37N	1350
6.56896	37.8003	37N	1365.3
6.569	37.8016	37N	1366.5
6.56815	37.8031	37N	1359.7
6.56657	37.8031	37N	1367.3
6.56572	37.8022	37N	1373.1
6.56474	37.8079	37N	1355.8
6.57071	37.8208	37N	1293.5
6.56857	37.8196	37N	1288.4
6.56687	37.8183	37N	1291.5
6.56486	37.8167	37N	1308.3
6.56444	37.8253	37N	1245.3
6.5658	37.8248	37N	1254.7
6.56222	37.8066	37N	1367.1
6.57721	37.7375	37N	1447.5
6.57576	37.7363	37N	1453.5
6.5755	37.7325	37N	1469
6.57243	37.7311	37N	1482.8
6.568	37.7321	37N	1482.6
6.56663	37.7356	37N	1468.5
6.56791	37.7384	37N	1460.7
6.56075	37.7377	37N	1481.4
6.55956	37.7352	37N	1492.5
6.56561	37.7229	37N	1513.5
6.56408	37.7217	37N	1522.3
6.56118	37.7197	37N	1535.6
6.55777	37.7372	37N	1484
6.55555	37.7351	37N	1500.2
6.55589	37.7287	37N	1533.5
6.55717	37.7169	37N	1555.5
6.55879	37.7149	37N	1550.7
6.56297	37.7248	37N	1521.1
6.56203	37.7242	37N	1523.4
6.55308	37.7116	37N	1580.6
6.56902	37.7048	37N	1551.8
6.56859	37.7021	37N	1559
6.56996	37.7008	37N	1572.6
6.56749	37.7006	37N	1556.9
6.5668	37.6975	37N	1574.8
6.56535	37.6967	37N	1575.1
6.56668	37.6982	37N	1570.1
6.56616	37.6997	37N	1553.7
6.57333	37.6948	37N	1623.7
6.56713	37.7959	37N	1385.8
6.56687	37.7931	37N	1386
6.56662	37.7908	37N	1389.2
6.5638	37.7815	37N	1403.6
6.56747	37.7766	37N	1406.2
6.57216	37.776	37N	1395.4
6.56449	37.7476	37N	1441
6.5638	37.7431	37N	1453.3
6.5725	37.7543	37N	1431.9
6.5725	37.7576	37N	1424.6
6.57028	37.7456	37N	1433.6
6.58052	37.7448	37N	1417.7
6.57949	37.7413	37N	1430
6.53242	37.7164	37N	1650.2
6.53566	37.7192	37N	1626.6
6.53464	37.7324	37N	1595.1
6.54163	37.7188	37N	1608.2
6.5476	37.7148	37N	1581.9
6.5517	37.7181	37N	1558
6.55238	37.7129	37N	1577.5
6.54956	37.7077	37N	1597.5
6.54658	37.7054	37N	1596.9
6.54939	37.7019	37N	1585.9
6.53984	37.6964	37N	1641.2
6.53916	37.7037	37N	1641.7
6.53831	37.7066	37N	1647.8
6.53456	37.7033	37N	1663.3
6.53464	37.6978	37N	1646.5
6.53157	37.6964	37N	1667.7
6.53089	37.7152	37N	1655.6
6.53456	37.7207	37N	1621.6
6.53004	37.7314	37N	1588.8
6.55451	37.6962	37N	1611
6.55442	37.6844	37N	1689.9
6.55297	37.6798	37N	1687.7
6.54743	37.6732	37N	1733.9
6.54274	37.6748	37N	1826.7
6.5407	37.6754	37N	1838
6.53873	37.6715	37N	1877.8
6.53822	37.6926	37N	1667.5
6.53404	37.695	37N	1659.7
6.52296	37.7015	37N	1709.4
6.5204	37.6974	37N	1724.1
6.51801	37.6973	37N	1737.9
6.51494	37.6938	37N	1754.5
6.52185	37.7204	37N	1606.9
6.53882	37.6825	37N	1729.7
6.53976	37.6761	37N	1840.9
6.53771	37.6695	37N	1869.4
6.52816	37.6698	37N	1983.6
6.52321	37.6676	37N	2042.3
6.52032	37.6665	37N	2059
6.53558	37.6599	37N	1844
6.53464	37.6574	37N	1877
6.52483	37.6471	37N	2018.3
6.52663	37.643	37N	2111.4
6.5285	37.6429	37N	2142.9
6.52918	37.6401	37N	2147.7
6.53046	37.6478	37N	2043.4
6.52449	37.6558	37N	1898.8
6.52722	37.6528	37N	1923.4
6.52407	37.6411	37N	2044.1
6.53217	37.6379	37N	2159.2
6.50616	37.6575	37N	2084.3
6.50931	37.6567	37N	2043.9
6.51469	37.658	37N	2005
6.51639	37.6508	37N	1970.6
6.51281	37.6492	37N	2004.3
6.50829	37.6467	37N	2059.5
6.5065	37.6545	37N	2067.3
6.51034	37.6544	37N	2036.6
6.51042	37.6522	37N	2027.7
6.51051	37.6505	37N	2023.3
6.50684	37.6518	37N	2057.4
6.50505	37.6513	37N	2087
6.51801	37.6522	37N	1956.3
6.51963	37.6601	37N	2003.1
6.5169	37.6607	37N	2066.1
6.52108	37.6645	37N	2039.2
6.49637	37.6576	37N	2185
6.49851	37.6548	37N	2143.8
6.5017	37.6598	37N	2186.5
6.50311	37.6528	37N	2122.8
6.5017	37.6526	37N	2125.8
6.50277	37.6512	37N	2127.8
6.50196	37.6495	37N	2137.5
6.5014	37.6484	37N	2141.5
6.49957	37.6484	37N	2142.6
6.49369	37.6531	37N	2157.3
6.49475	37.6543	37N	2164
6.49595	37.6541	37N	2154.5
6.49748	37.6532	37N	2136.8
6.50592	37.6634	37N	2149.9
6.50239	37.6624	37N	2176
6.49897	37.6626	37N	2176.8
6.5	37.6601	37N	2208.6
6.49382	37.65	37N	2163.9
6.49424	37.6479	37N	2166.3
6.49556	37.648	37N	2160.1
6.49774	37.6487	37N	2147.6
6.49944	37.6491	37N	2142.9
6.49859	37.6501	37N	2141.2
6.49684	37.6499	37N	2146.8
6.49531	37.6512	37N	2152.2
6.4797	37.6592	37N	2212.7
6.47697	37.6583	37N	2257.4
6.47846	37.6622	37N	2159.3
6.4803	37.6639	37N	2133
6.48183	37.6653	37N	2108
6.48465	37.6664	37N	2094.3
6.48478	37.6647	37N	2117.3
6.48409	37.6629	37N	2151.4
6.48371	37.6607	37N	2195.1
6.48315	37.6599	37N	2213.8
6.48269	37.6587	37N	2245.7
6.48367	37.6583	37N	2270.5
6.48533	37.6604	37N	2231.3
6.48883	37.6657	37N	2104.4
6.4893	37.6663	37N	2091
6.48976	37.6674	37N	2075.6
6.48725	37.6669	37N	2082.9
6.48439	37.667	37N	2083.3
6.48269	37.6675	37N	2060.7
6.48397	37.665	37N	2119
6.4829	37.6617	37N	2171
6.47893	37.6601	37N	2207.6
6.47825	37.6571	37N	2262.6
6.47825	37.6662	37N	2048.6
6.47804	37.6691	37N	1912.6
6.48379	37.6738	37N	1882.2
6.48439	37.672	37N	1957.7
6.47109	37.674	37N	1762.4
6.46994	37.6728	37N	1777
6.46994	37.6708	37N	1814.4
6.46832	37.6704	37N	1829.2
6.46819	37.6674	37N	1895.5
6.46797	37.6638	37N	1973.2
6.46768	37.6612	37N	2042
6.46631	37.6612	37N	2032.8
6.47262	37.6571	37N	2266.6
6.47096	37.6562	37N	2297.9
6.46819	37.6544	37N	2333.6
6.47041	37.6572	37N	2274.7
6.47228	37.6583	37N	2251.2
6.47151	37.6611	37N	2170.2
6.47463	37.6602	37N	2191.3
6.47808	37.6603	37N	2205.1
6.47539	37.6731	37N	1809.2
6.47829	37.675	37N	1791.1
6.47838	37.6799	37N	1716.2
6.47701	37.6801	37N	1697.4
6.4762	37.6806	37N	1682.2
6.47493	37.6816	37N	1666.1
6.4736	37.6819	37N	1643.6
6.47245	37.6972	37N	1597.8
6.47288	37.7011	37N	1557.1
6.47075	37.6941	37N	1632.9
6.47804	37.6904	37N	1600.2
6.47834	37.6892	37N	1600.7
6.47991	37.6878	37N	1599.5
6.46482	37.6888	37N	1547.1
6.46388	37.6874	37N	1541.4
6.46375	37.6861	37N	1544.5
6.46362	37.6844	37N	1557.1
6.46358	37.6836	37N	1572.2
6.46345	37.6822	37N	1582.9
6.46397	37.6799	37N	1613.5
6.46836	37.6829	37N	1604.1
6.46815	37.6817	37N	1629.3
6.46571	37.6818	37N	1613.5
6.46695	37.6781	37N	1695.2
6.46674	37.6762	37N	1728.3
6.46507	37.6772	37N	1667.4
6.47053	37.6962	37N	1613.1
6.47301	37.6933	37N	1644.5
6.47019	37.6929	37N	1634.1
6.47087	37.6917	37N	1640.2
6.47215	37.6906	37N	1651.8
6.46806	37.6916	37N	1596.3
6.46768	37.6904	37N	1609.8
6.45612	37.6955	37N	1630.6
6.45168	37.6981	37N	1665.5
6.45143	37.6959	37N	1700.2
6.45284	37.6941	37N	1677.4
6.45237	37.6927	37N	1666.2
6.45143	37.6862	37N	1686.4
6.4571	37.688	37N	1604.2
6.45817	37.6882	37N	1591.3
6.46081	37.6856	37N	1567.8
6.4591	37.6851	37N	1590.8
6.45876	37.6842	37N	1615
6.45791	37.6782	37N	1629.3
6.45795	37.6764	37N	1668.6
6.45292	37.6793	37N	1626.5
6.45134	37.6787	37N	1648.6
6.45079	37.6771	37N	1651.3
6.44964	37.6794	37N	1679.1
6.45181	37.6801	37N	1636.4
6.45433	37.6805	37N	1604.5
6.45505	37.6814	37N	1589.6
6.45156	37.6816	37N	1635.8
6.44998	37.6807	37N	1662.5
6.44968	37.6823	37N	1678.7
6.44832	37.6827	37N	1734.1
6.44866	37.694	37N	1754.7
6.44861	37.6923	37N	1713.8
6.44695	37.6945	37N	1797.4
6.44508	37.6936	37N	1800.4
6.44247	37.6921	37N	1822.1
6.44141	37.6903	37N	1840.3
6.43979	37.6898	37N	1856.4
6.43979	37.688	37N	1859
6.43898	37.6864	37N	1840.7
6.43787	37.6871	37N	1877.2
6.43603	37.6841	37N	1899.7
6.41646	37.6832	37N	1930.3
6.41727	37.6834	37N	1918
6.41501	37.6828	37N	1940.4
6.4133	37.6811	37N	1980.5
6.41151	37.6839	37N	1994.8
6.40755	37.6841	37N	1925.1
6.40887	37.6783	37N	2036.8
6.41126	37.6775	37N	1999
6.41173	37.6767	37N	2008.3
6.41318	37.6766	37N	1984.1
6.4171	37.6611	37N	2266.1
6.41365	37.6644	37N	2202.5
6.41484	37.6651	37N	2179.9
6.41544	37.6691	37N	2079.6
6.4174	37.6708	37N	2043.3
6.41919	37.6659	37N	2062.4
6.41804	37.6646	37N	2132.6
6.4136	37.6609	37N	2369.4
6.41173	37.661	37N	2364.5
6.41015	37.6611	37N	2362.6
6.40806	37.6608	37N	2406.2
6.40797	37.6634	37N	2261.4
6.40849	37.6641	37N	2236.7
6.41011	37.6636	37N	2247.7
6.4119	37.6632	37N	2244.6
6.41309	37.6634	37N	2228.4
6.41254	37.6678	37N	2123.3
6.41241	37.6689	37N	2094.6
6.41053	37.6764	37N	2029.7
6.41053	37.6763	37N	2031.8
6.40998	37.6753	37N	2057.5
6.40725	37.6759	37N	2091.1
6.40785	37.675	37N	2082.2
6.40785	37.6749	37N	2081.6
6.36801	37.7826	37N	1213.4
6.36707	37.7857	37N	1206.2
6.36601	37.7856	37N	1202.7
6.36434	37.789	37N	1187.1
6.36443	37.7866	37N	1194.9
6.36375	37.7856	37N	1197.9
6.36358	37.7844	37N	1206.8
6.36247	37.7844	37N	1203.7
6.36268	37.78	37N	1248.7
6.36707	37.7477	37N	1262.9
6.36682	37.7454	37N	1269.9
6.36716	37.7423	37N	1277.6
6.36695	37.7395	37N	1288.9
6.36946	37.7338	37N	1309
6.36908	37.7361	37N	1301
6.36925	37.7377	37N	1295.6
6.36916	37.7398	37N	1287.6
6.36925	37.7416	37N	1281.1
6.3695	37.7443	37N	1272.9
6.36891	37.7464	37N	1265
6.36899	37.7474	37N	1262.4
6.36976	37.7479	37N	1261.1
6.36942	37.7489	37N	1258.3
6.3649	37.7494	37N	1261.3
6.36409	37.7483	37N	1266.2
6.36439	37.747	37N	1265.5
6.35905	37.7437	37N	1289
6.35927	37.7416	37N	1291.7
6.36102	37.7417	37N	1282.6
6.35743	37.7439	37N	1296.6
6.35726	37.7425	37N	1298.8
6.35927	37.7389	37N	1293.9
6.36055	37.7382	37N	1290.9
6.52859	37.7928	37N	1193.2
6.52722	37.7941	37N	1188.7
6.52756	37.8021	37N	1184.4
6.52049	37.7882	37N	1196.6
6.51238	37.778	37N	1201
6.50565	37.7736	37N	1201.8
6.51648	37.788	37N	1192.7
6.51494	37.7846	37N	1197.4
6.52032	37.7826	37N	1210.2
6.50812	37.7787	37N	1195
6.51477	37.7797	37N	1199.2
6.50326	37.7685	37N	1205.8
6.49985	37.7714	37N	1191.9
6.49968	37.7679	37N	1201.8
6.49072	37.7629	37N	1203.2
6.48612	37.7631	37N	1192.4
6.48765	37.7661	37N	1193.5
6.48535	37.7665	37N	1186.8
6.47273	37.7581	37N	1194.7
6.47196	37.7552	37N	1204.4
6.47009	37.7572	37N	1197.7
6.46957	37.7555	37N	1202.4
6.49106	37.7696	37N	1192.4
6.49166	37.7667	37N	1196
6.47895	37.7623	37N	1186.8
6.47691	37.7639	37N	1185.6
6.40288	37.7697	37N	1190.4
6.40347	37.7685	37N	1192.4
6.4016	37.7656	37N	1199.4
6.40544	37.7643	37N	1199.4
6.40595	37.7634	37N	1202
6.4091	37.7614	37N	1203.2
6.41124	37.7636	37N	1194.5
6.42292	37.761	37N	1202.5
6.42011	37.7599	37N	1200.9
6.42087	37.7633	37N	1196.1
6.42053	37.7659	37N	1190.2
6.60841	37.6933	37N	1562.9
6.60909	37.6918	37N	1558.9
6.61063	37.6905	37N	1553.4
6.61174	37.6856	37N	1542.3
6.60381	37.6945	37N	1571.6
6.57729	37.7313	37N	1456
6.56408	37.7194	37N	1511.3
6.56126	37.7154	37N	1529.4
6.56024	37.7166	37N	1544.7
6.5576	37.7274	37N	1527.5
6.55504	37.7247	37N	1541.5
6.55018	37.6994	37N	1598.2
6.5599	37.7138	37N	1535.7
6.55043	37.7451	37N	1491.3
6.55163	37.7388	37N	1497.1
6.57209	37.722	37N	1491.9
6.4034	37.741	37N	1266.5
6.40296	37.7413	37N	1266.5
6.40357	37.7415	37N	1265.6
6.4037	37.7421	37N	1263.5
6.40373	37.7428	37N	1260.7
6.40387	37.7429	37N	1260.1
6.40399	37.743	37N	1259.4
6.60884	37.7044	37N	1541.7
6.60986	37.7038	37N	1542.8
6.6131	37.7059	37N	1536.4
6.54881	37.7203	37N	1571.1
6.55035	37.7217	37N	1563.4
6.57883	37.7209	37N	1495.4
6.57755	37.7209	37N	1496.7
6.57303	37.7163	37N	1502.2
6.57857	37.7172	37N	1516
6.58309	37.7108	37N	1559.2
6.34274	37.7528	37N	1312.2
6.3412	37.7497	37N	1321.5
6.34257	37.7468	37N	1328.1
6.35281	37.7454	37N	1308.6
6.35144	37.7497	37N	1303.8
6.35827	37.7507	37N	1285.3
6.3714	37.751	37N	1254.7
6.37345	37.7558	37N	1247.4
6.35212	37.7612	37N	1308.7
6.35008	37.7545	37N	1301.9
6.48045	37.7769	37N	1176
6.42109	37.7783	37N	1176
6.39925	37.79	37N	1176
6.35831	37.7913	37N	1176
6.34057	37.7934	37N	1176
6.43678	37.8092	37N	1176
6.50023	37.8209	37N	1176
6.51319	37.7968	37N	1180.3
6.50569	37.7872	37N	1176
6.50637	37.8037	37N	1176
6.48454	37.7989	37N	1176
6.45589	37.7831	37N	1176
6.4552	37.7968	37N	1176
6.48932	37.8161	37N	1176
6.46407	37.8161	37N	1176
6.38424	37.8003	37N	1176
6.41085	37.7749	37N	1176
6.44633	37.7891	37N	1176
6.43115	37.79	37N	1176
6.45571	37.8078	37N	1176
6.47243	37.7702	37N	1180.6
6.48096	37.7687	37N	1182.2
6.48505	37.7704	37N	1182.6
6.4888	37.7749	37N	1179.6
6.48761	37.7879	37N	1176
6.46254	37.7648	37N	1191.8
6.46151	37.7637	37N	1195
6.45972	37.7623	37N	1199.1
6.45853	37.7607	37N	1199.9
6.45827	37.7593	37N	1200.7
6.45793	37.7578	37N	1202.2
6.45768	37.7556	37N	1206.1
6.45776	37.7546	37N	1207.1
6.45708	37.7531	37N	1208.9
6.45734	37.7522	37N	1210.9
6.57017	37.7145	37N	1506.8
6.57007	37.7143	37N	1506.3
6.57024	37.714	37N	1506.4
6.57042	37.7136	37N	1507.7
6.57024	37.7131	37N	1509.2
6.57006	37.7127	37N	1509.8
6.56994	37.7126	37N	1509.8
6.56975	37.7123	37N	1511.1
6.56961	37.7121	37N	1512.1
6.5697	37.7119	37N	1513.3
6.56945	37.7117	37N	1513.6
6.56898	37.7115	37N	1514.7
6.56882	37.7114	37N	1515.6
6.5689	37.7113	37N	1515.4
6.56907	37.7112	37N	1515
6.56891	37.711	37N	1515.8
6.56881	37.7108	37N	1516
6.56895	37.7107	37N	1516.6
6.56894	37.7105	37N	1517.1
6.56865	37.7105	37N	1516.6
6.56853	37.7103	37N	1516.5
6.56848	37.71	37N	1516.7
6.56848	37.7097	37N	1517.7
6.56844	37.7095	37N	1518.2
6.568	37.7096	37N	1518
6.56813	37.709	37N	1519.7
6.56785	37.7087	37N	1520.9
6.56757	37.7088	37N	1520.1
6.56753	37.7087	37N	1520.1
6.56763	37.7085	37N	1520.6
6.46569	37.753	37N	1210.1
6.468	37.7537	37N	1206.7
6.46608	37.7505	37N	1214.7
6.46497	37.7513	37N	1213.4
6.46326	37.7513	37N	1213.5
6.46288	37.7515	37N	1213.3
6.46062	37.7492	37N	1218.7
6.4613	37.7465	37N	1224.2
6.46275	37.7459	37N	1224.7
6.46561	37.7468	37N	1222.2
6.45751	37.7479	37N	1219.7
6.45734	37.7487	37N	1217.9
6.45533	37.7506	37N	1211.6
6.45584	37.7499	37N	1214.3
6.45584	37.7495	37N	1215.7
6.45516	37.7491	37N	1215.5
6.45444	37.7487	37N	1216.3
6.45456	37.7483	37N	1216.7
6.45435	37.747	37N	1219.2
6.45452	37.7464	37N	1221.1
6.45456	37.7454	37N	1223.3
6.45652	37.7443	37N	1227.2
6.4607	37.747	37N	1222.9
6.46122	37.7473	37N	1222.2
6.46292	37.7482	37N	1221
6.45405	37.7461	37N	1221.7
6.45303	37.7449	37N	1223.7
6.45286	37.7439	37N	1227
6.45162	37.7455	37N	1225.6
6.45047	37.7432	37N	1236.6
6.45107	37.7429	37N	1236.7
6.45094	37.7472	37N	1221.9
6.45175	37.7477	37N	1219.5
6.45055	37.7461	37N	1226.7
6.45827	37.7454	37N	1224
6.459	37.7457	37N	1223.3
6.45644	37.7469	37N	1220.6
6.46463	37.7497	37N	1217
6.45866	37.743	37N	1229.8
6.46505	37.7483	37N	1220.9
6.59509	37.6946	37N	1585
6.59331	37.6952	37N	1577.5
6.5934	37.6951	37N	1578.3
6.59356	37.6935	37N	1592.2
6.59315	37.6928	37N	1595.7
6.59304	37.6932	37N	1592
6.59405	37.6919	37N	1603.3
6.59405	37.6916	37N	1604.5
6.59447	37.6923	37N	1599.9
6.59501	37.6939	37N	1589.3
6.59521	37.6937	37N	1590.4
6.59496	37.6971	37N	1570.2
6.59496	37.6973	37N	1569.5
6.59217	37.6937	37N	1582.2
6.59706	37.6954	37N	1579.3
6.59706	37.6958	37N	1577.6
6.59604	37.6944	37N	1584.1
6.59887	37.6962	37N	1574.5
6.59553	37.6984	37N	1564.4
6.59715	37.695	37N	1580.9
6.59845	37.6935	37N	1585.3
6.59701	37.7004	37N	1556.6
6.59705	37.6993	37N	1560.7
6.59765	37.7011	37N	1551.7
6.59019	37.685	37N	1631.8
6.59057	37.6852	37N	1630.9
6.59258	37.6879	37N	1615.9
6.50106	37.6572	37N	2149.7
6.50187	37.6562	37N	2130.3
6.50025	37.6502	37N	2143.7
6.50162	37.6497	37N	2140.2
6.50136	37.6612	37N	2185.4
6.49049	37.6595	37N	2231
6.49897	37.6566	37N	2167.3
6.50149	37.6558	37N	2135.1
6.49996	37.6505	37N	2144.5
6.50081	37.6529	37N	2126.8
6.5	37.6527	37N	2130.1
6.49974	37.6521	37N	2136
6.50004	37.652	37N	2137.1
6.49953	37.6561	37N	2159
6.49923	37.6559	37N	2158.7
6.47527	37.6915	37N	1633.4
6.4751	37.6904	37N	1636.6
6.47569	37.6899	37N	1630.4
6.4751	37.6876	37N	1640.6
6.47403	37.6864	37N	1655.7
6.47377	37.6863	37N	1656.2
6.47288	37.6866	37N	1658.1
6.47356	37.6869	37N	1656.9
6.47215	37.6888	37N	1661
6.47326	37.6893	37N	1660.4
6.47593	37.7583	37N	1195.2
6.47891	37.7601	37N	1193.9
6.48164	37.7616	37N	1189.4
6.48454	37.7633	37N	1189
6.48787	37.7652	37N	1194.5
6.46987	37.7547	37N	1204
6.52027	37.7794	37N	1221.5
6.52206	37.777	37N	1265.5
6.5265	37.766	37N	1368.2
6.53264	37.765	37N	1400.7
6.52496	37.7712	37N	1335.1
6.54415	37.7573	37N	1474.7
6.53963	37.7589	37N	1432.7
6.53835	37.7594	37N	1434.5
6.53716	37.7614	37N	1437.4
6.59147	37.6934	37N	1577.2
6.59083	37.6931	37N	1571.3
6.5901	37.6926	37N	1567.8
6.58963	37.6925	37N	1565.8
6.59428	37.6992	37N	1556.7
6.59407	37.6999	37N	1553
6.5962	37.7013	37N	1549.6
6.59744	37.7016	37N	1549.4
6.60063	37.7043	37N	1543.3
6.59965	37.703	37N	1546.3
6.5994	37.6791	37N	1576.3
6.5962	37.6815	37N	1593.9
6.59466	37.6822	37N	1602.2
6.60357	37.6874	37N	1564.5
6.60293	37.6876	37N	1567.3
6.60025	37.695	37N	1577.3
6.6037	37.6952	37N	1570.5
6.59974	37.6929	37N	1581.4
6.59731	37.692	37N	1592.8
6.59692	37.6913	37N	1594.8
6.593	37.6908	37N	1606.2
6.59304	37.6896	37N	1610.5
6.50486	37.6623	37N	2159.3
6.50303	37.6617	37N	2177.1
6.50204	37.6614	37N	2182.1
6.49974	37.6596	37N	2206.6
6.49829	37.6592	37N	2216.8
6.49714	37.6595	37N	2208.2
6.49514	37.6581	37N	2209.2
6.4945	37.6568	37N	2204.2
6.493	37.6552	37N	2199.6
6.49411	37.665	37N	2140.7
6.49544	37.6639	37N	2145.5
